# Supplementary material for: Machine Learning Applications in Biofuels’ Life Cycle: Soil, Feedstock, Production, Consumption, and Emissions
Source: Preprints.org preprint supplement (doi:10.20944/preprints202009.0068.v1), 2020-09-03

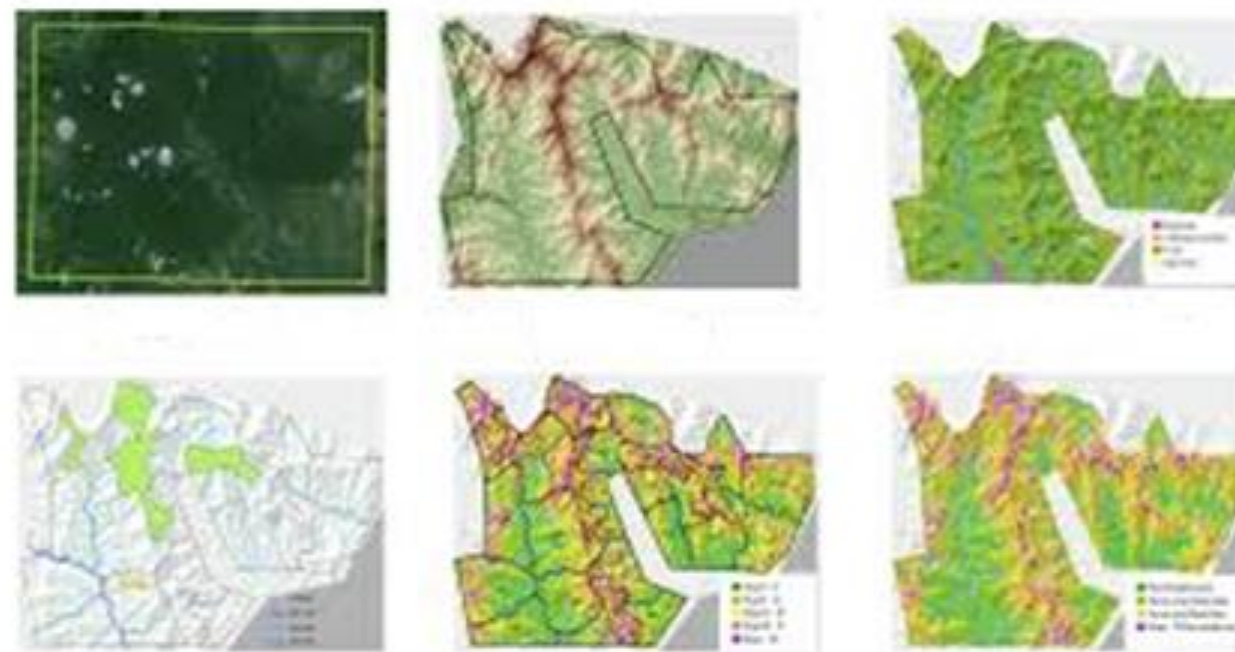

**Soil**  
Crop estimation  
and  
Sustainability  
Analysis

**Feed Stocks**  
Rheological  
Properties and  
Optimum  
Blends of  
Biomass

**Consumption  
and Emissions**  
Engine  
Performance  
and Emissions

**Production**  
Estimation of  
Yield, Quality  
and Process  
Efficiency

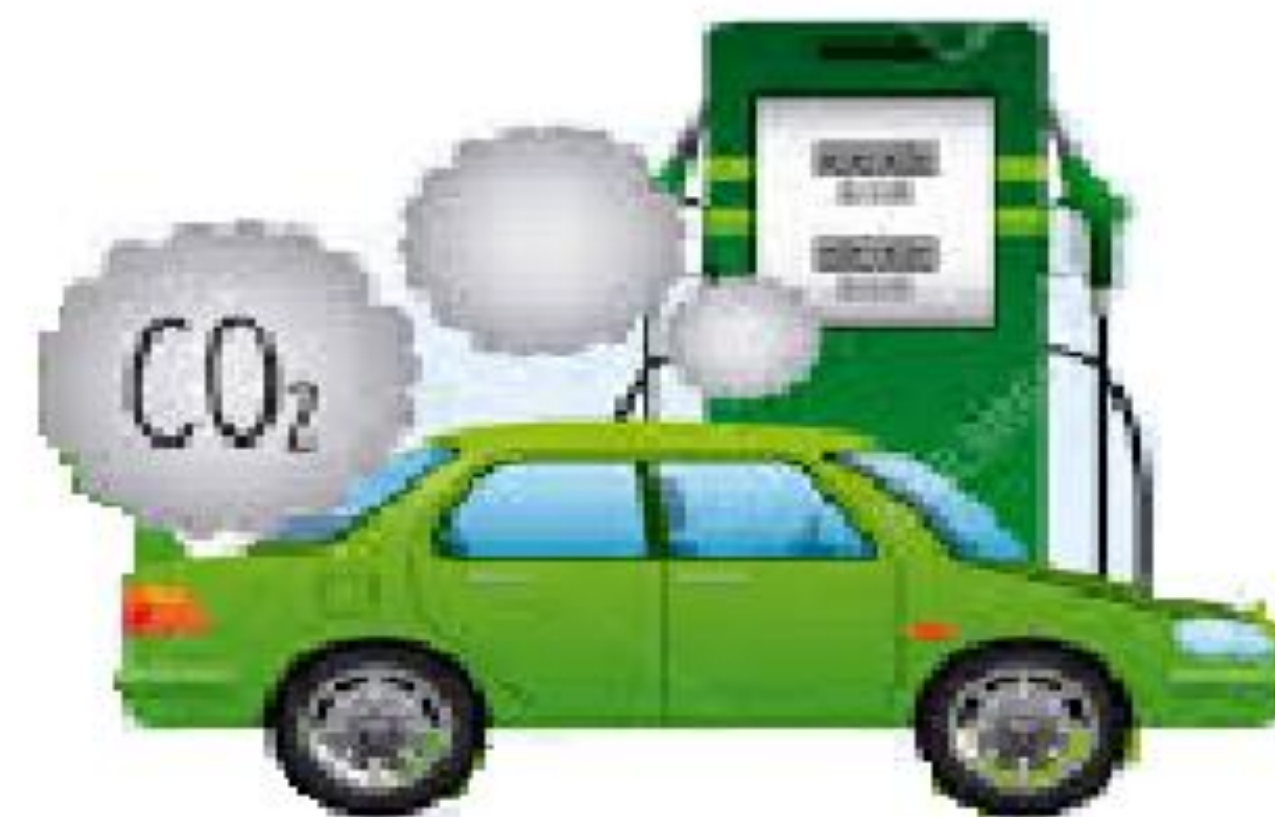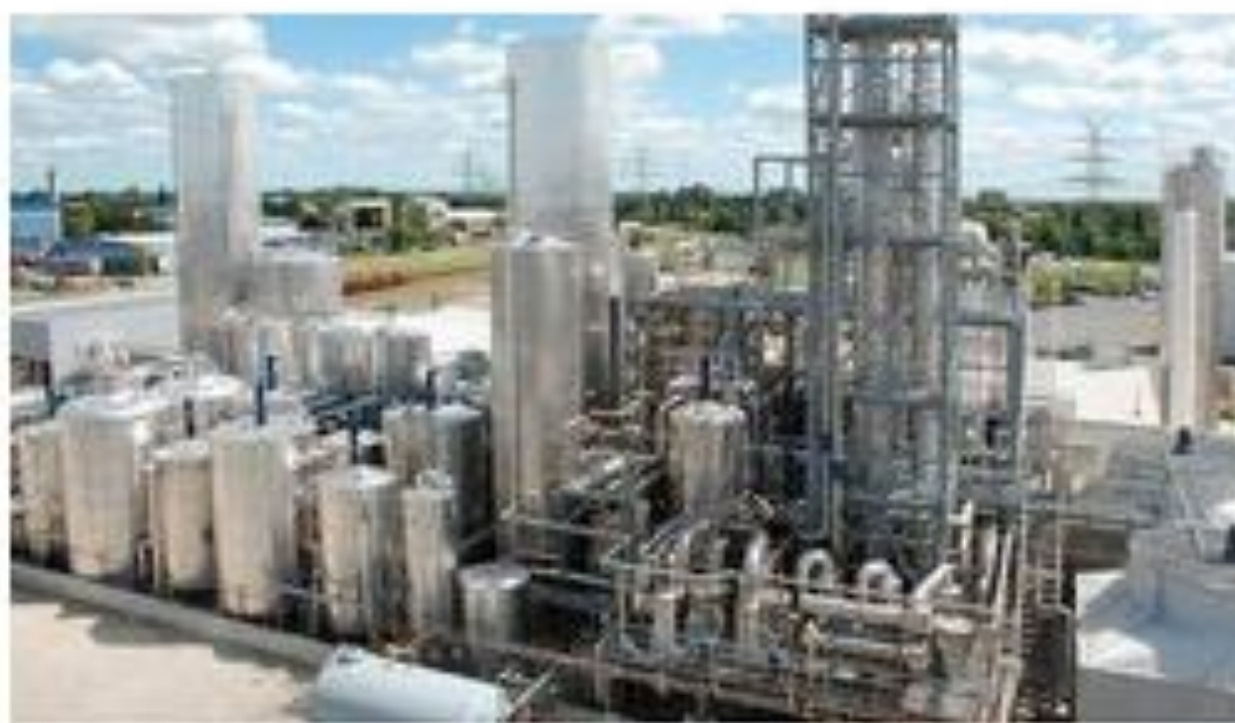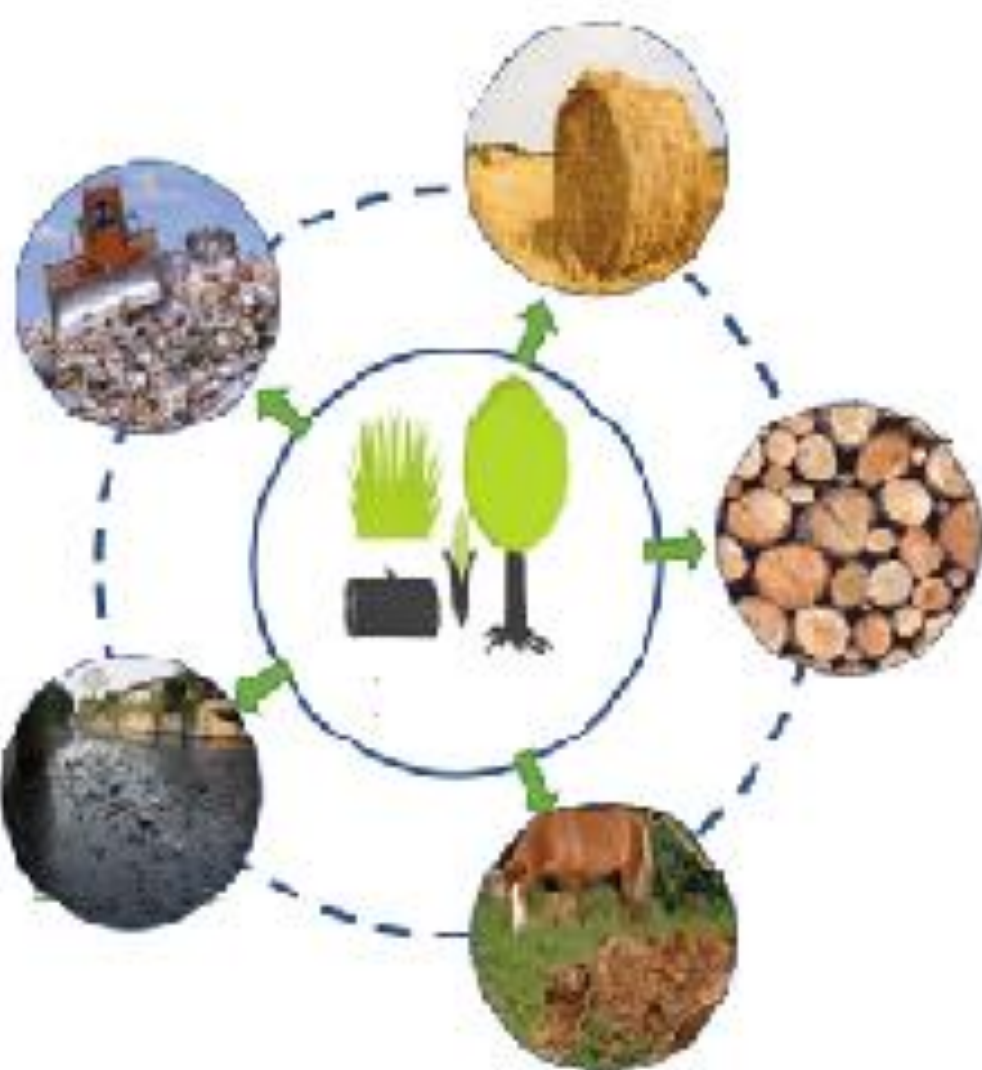

Supplement: Supplementary file 1 [file BiofuelsLifecycle.pdf]
