# Supplementary material for: Machine Learning Applications in Biofuels’ Life Cycle: Soil, Feedstock, Production, Consumption, and Emissions
Source: Preprints.org preprint supplement (doi:10.20944/preprints202009.0068.v1), 2020-09-03
Supplement: Supplementary file 10 [file logo-mdpi-eps-converted-to.pdf]

A dark blue outline of a house, consisting of a triangular roof and a rectangular base. The letters 'MDPI' are centered within the house shape.

**MDPI**
