# Supplementary figures and images for: Machine Learning Applications in Biofuels’ Life Cycle: Soil, Feedstock, Production, Consumption, and Emissions
Source: Preprints.org preprint supplement (doi:10.20944/preprints202009.0068.v1), 2020-09-03

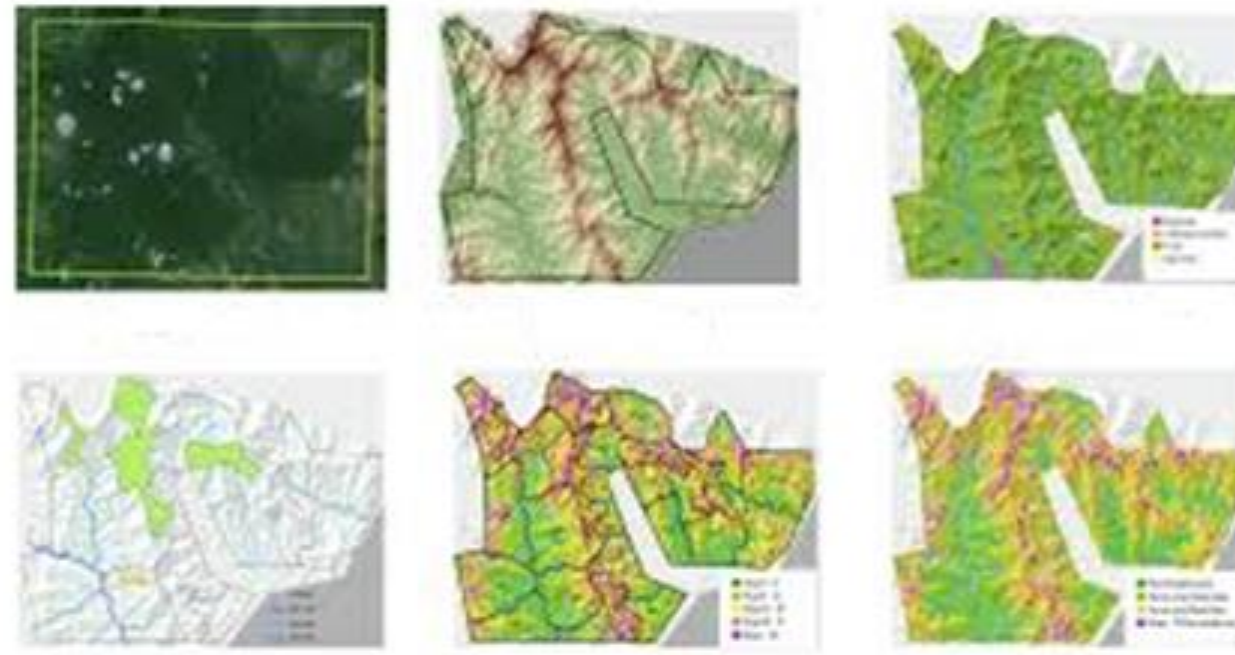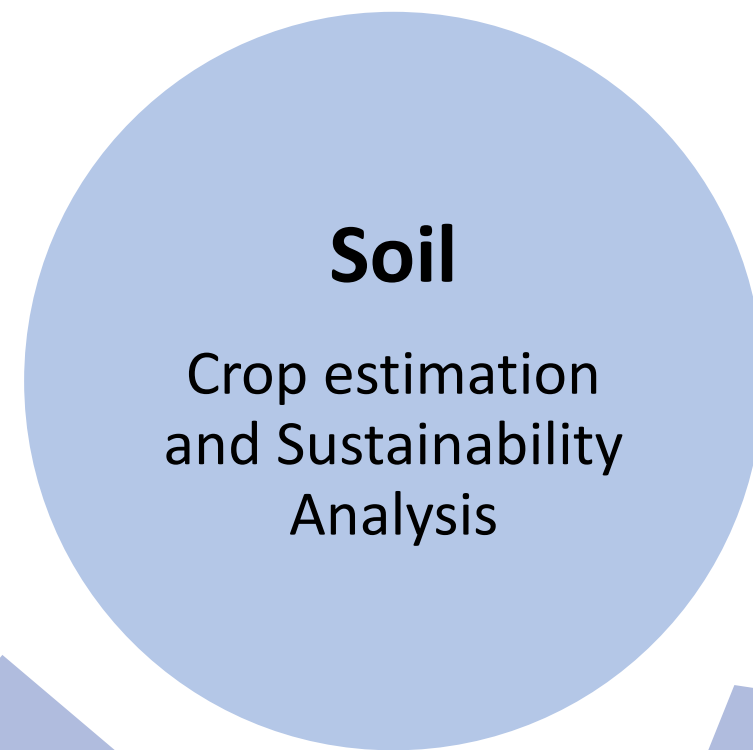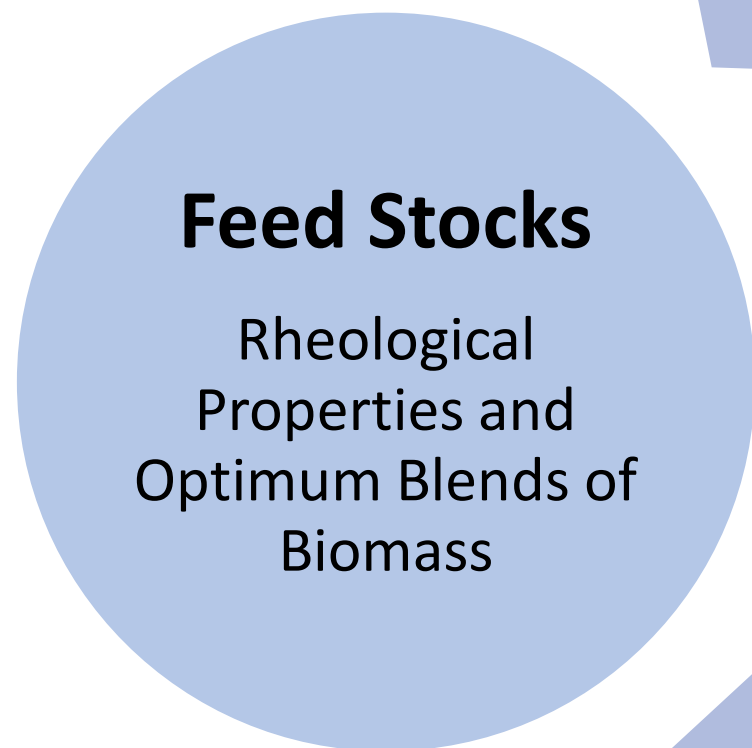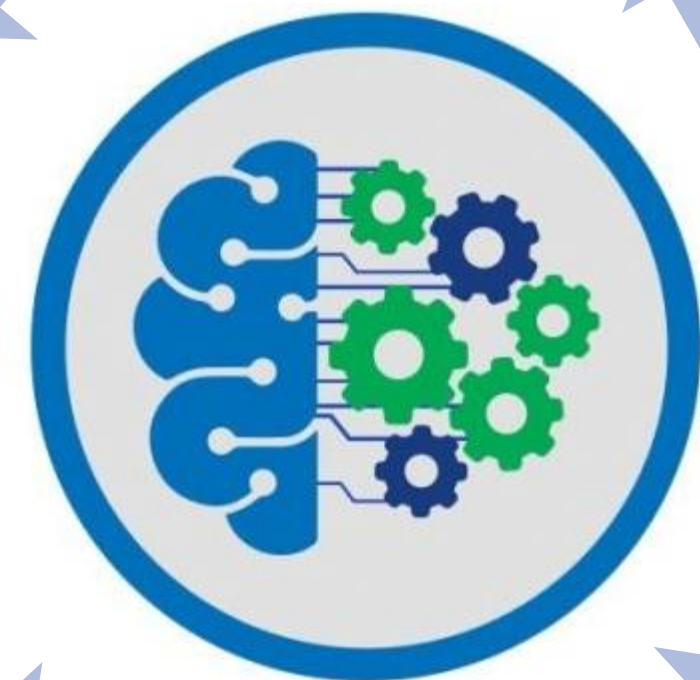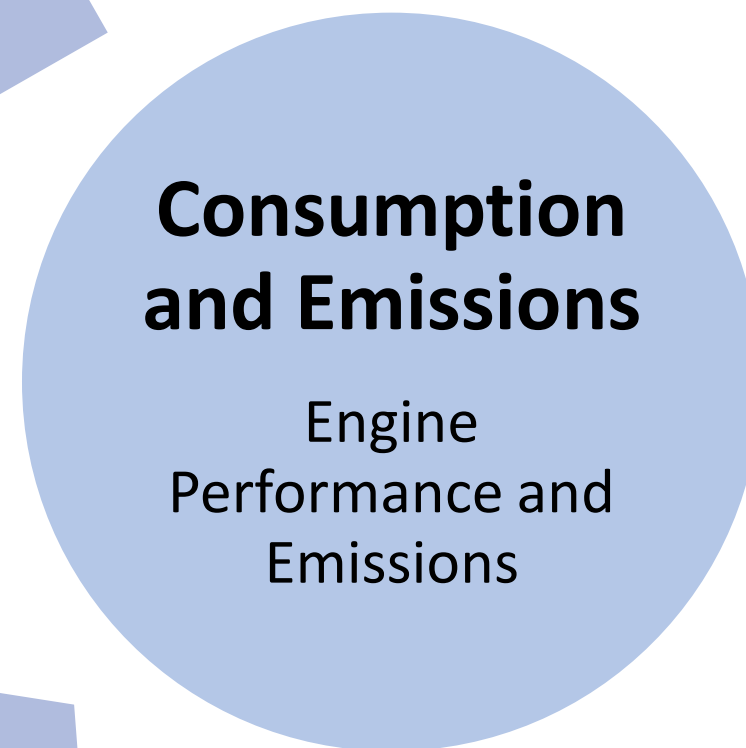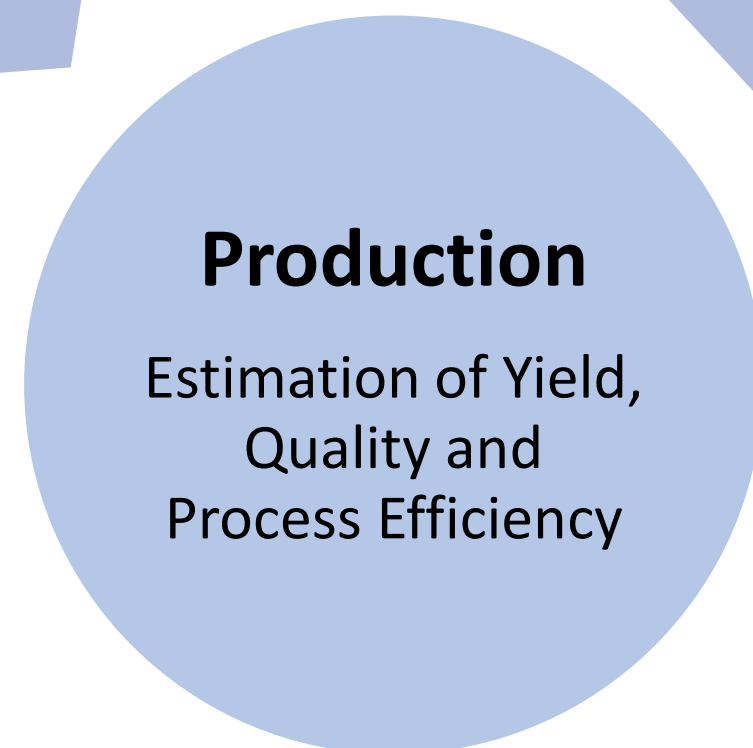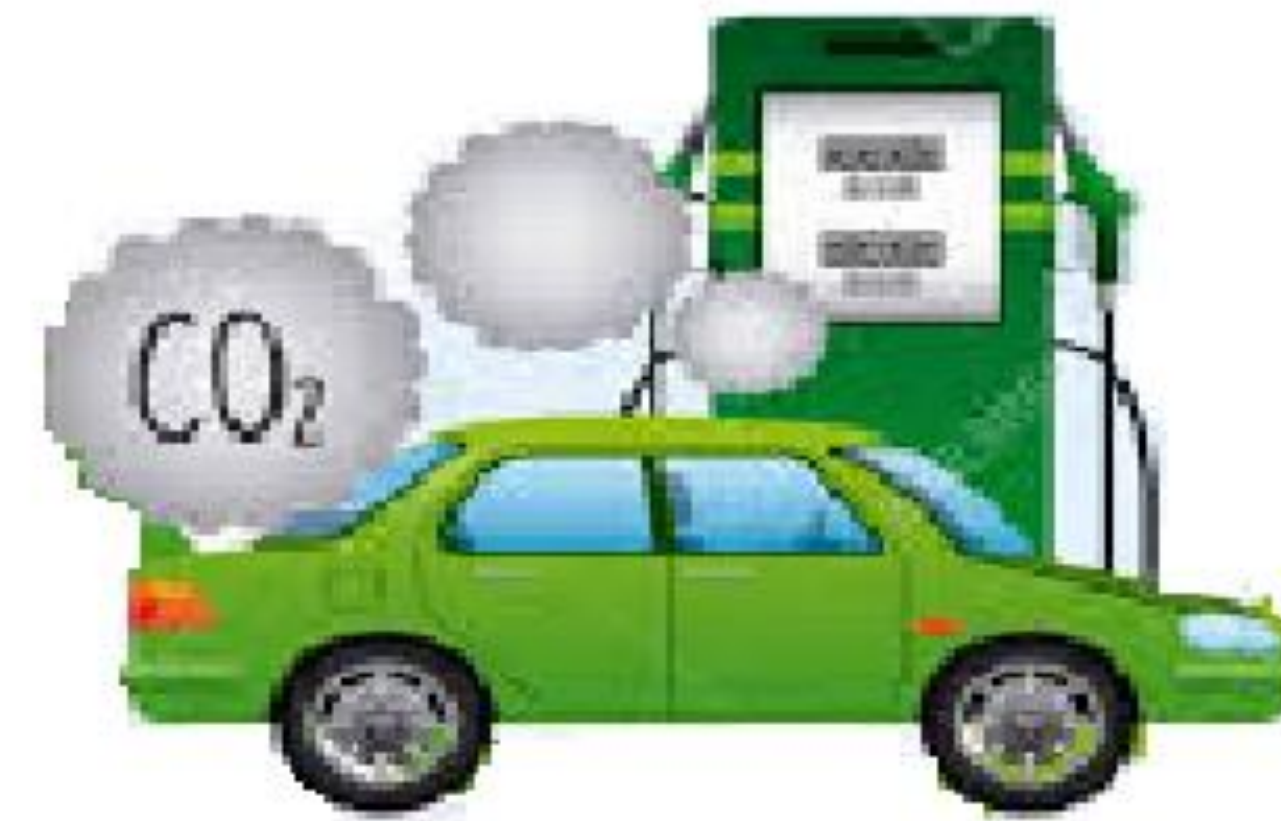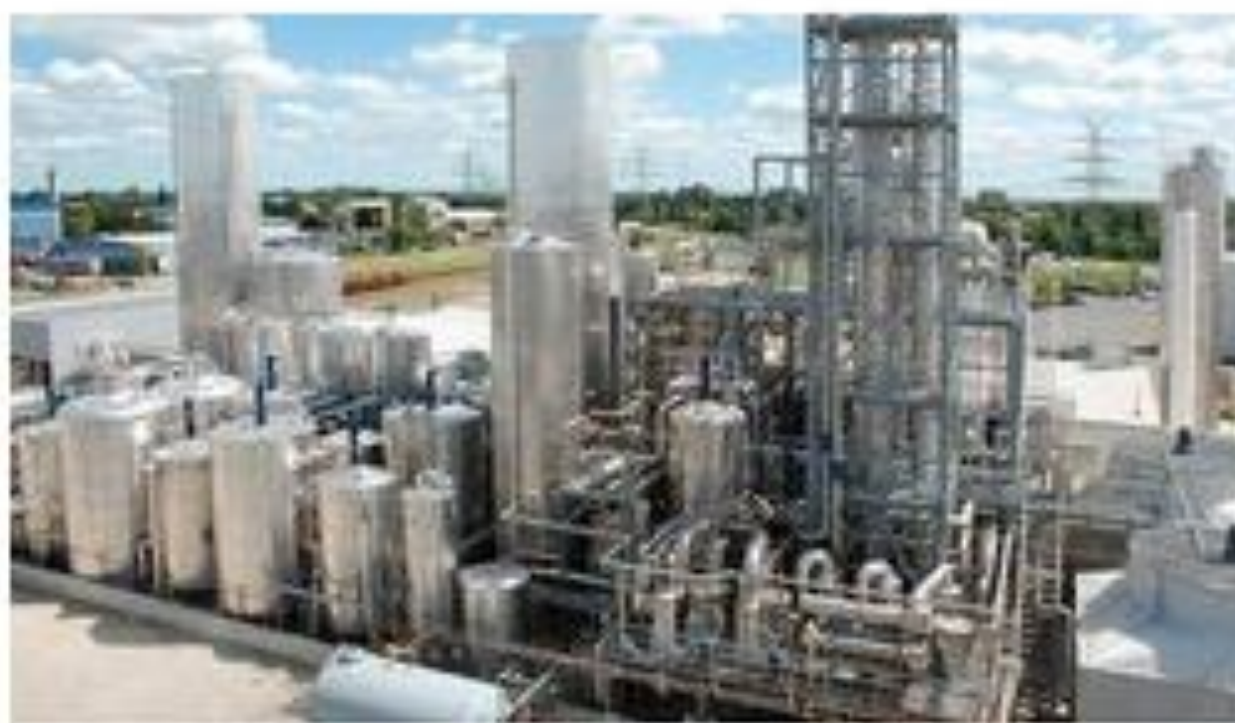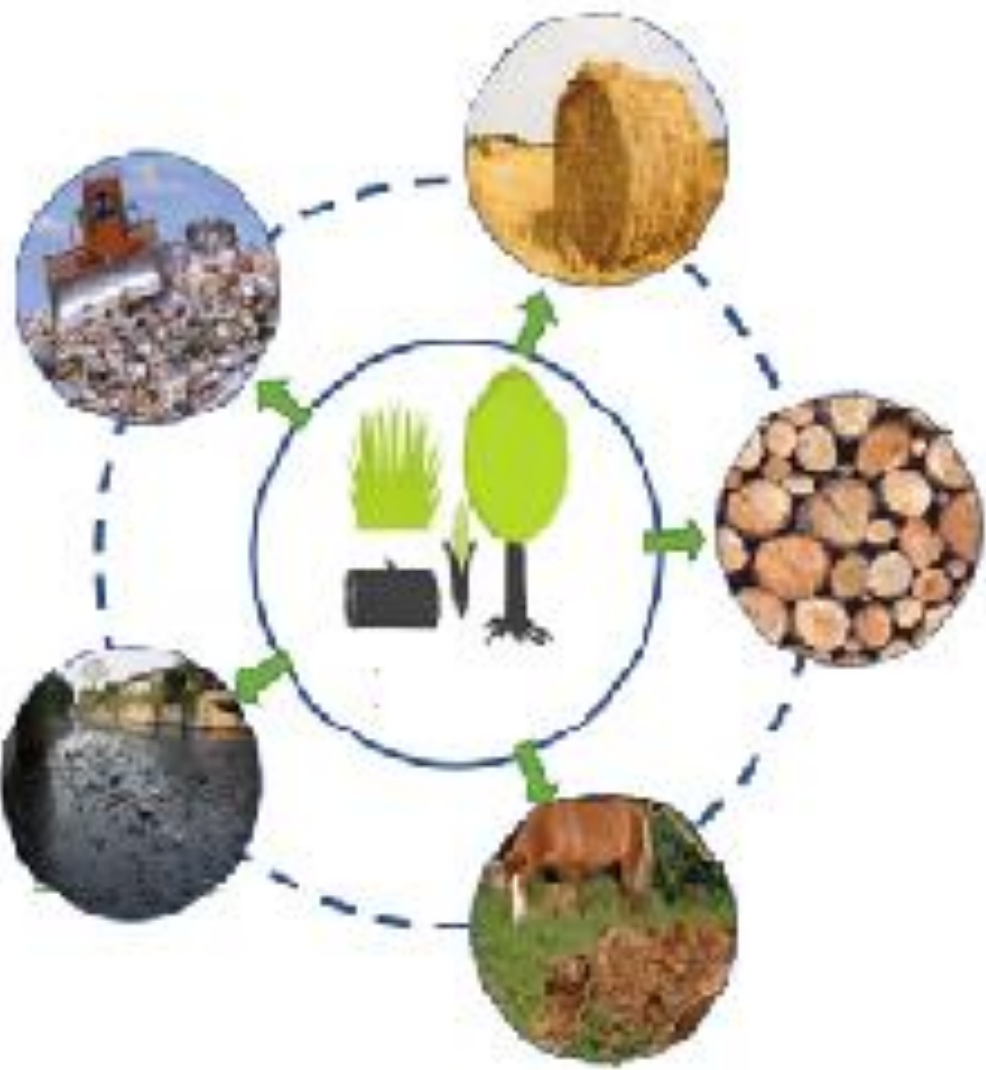

Supplement: Supplementary file 2 [file BiofuelsLifecycle1.pdf]

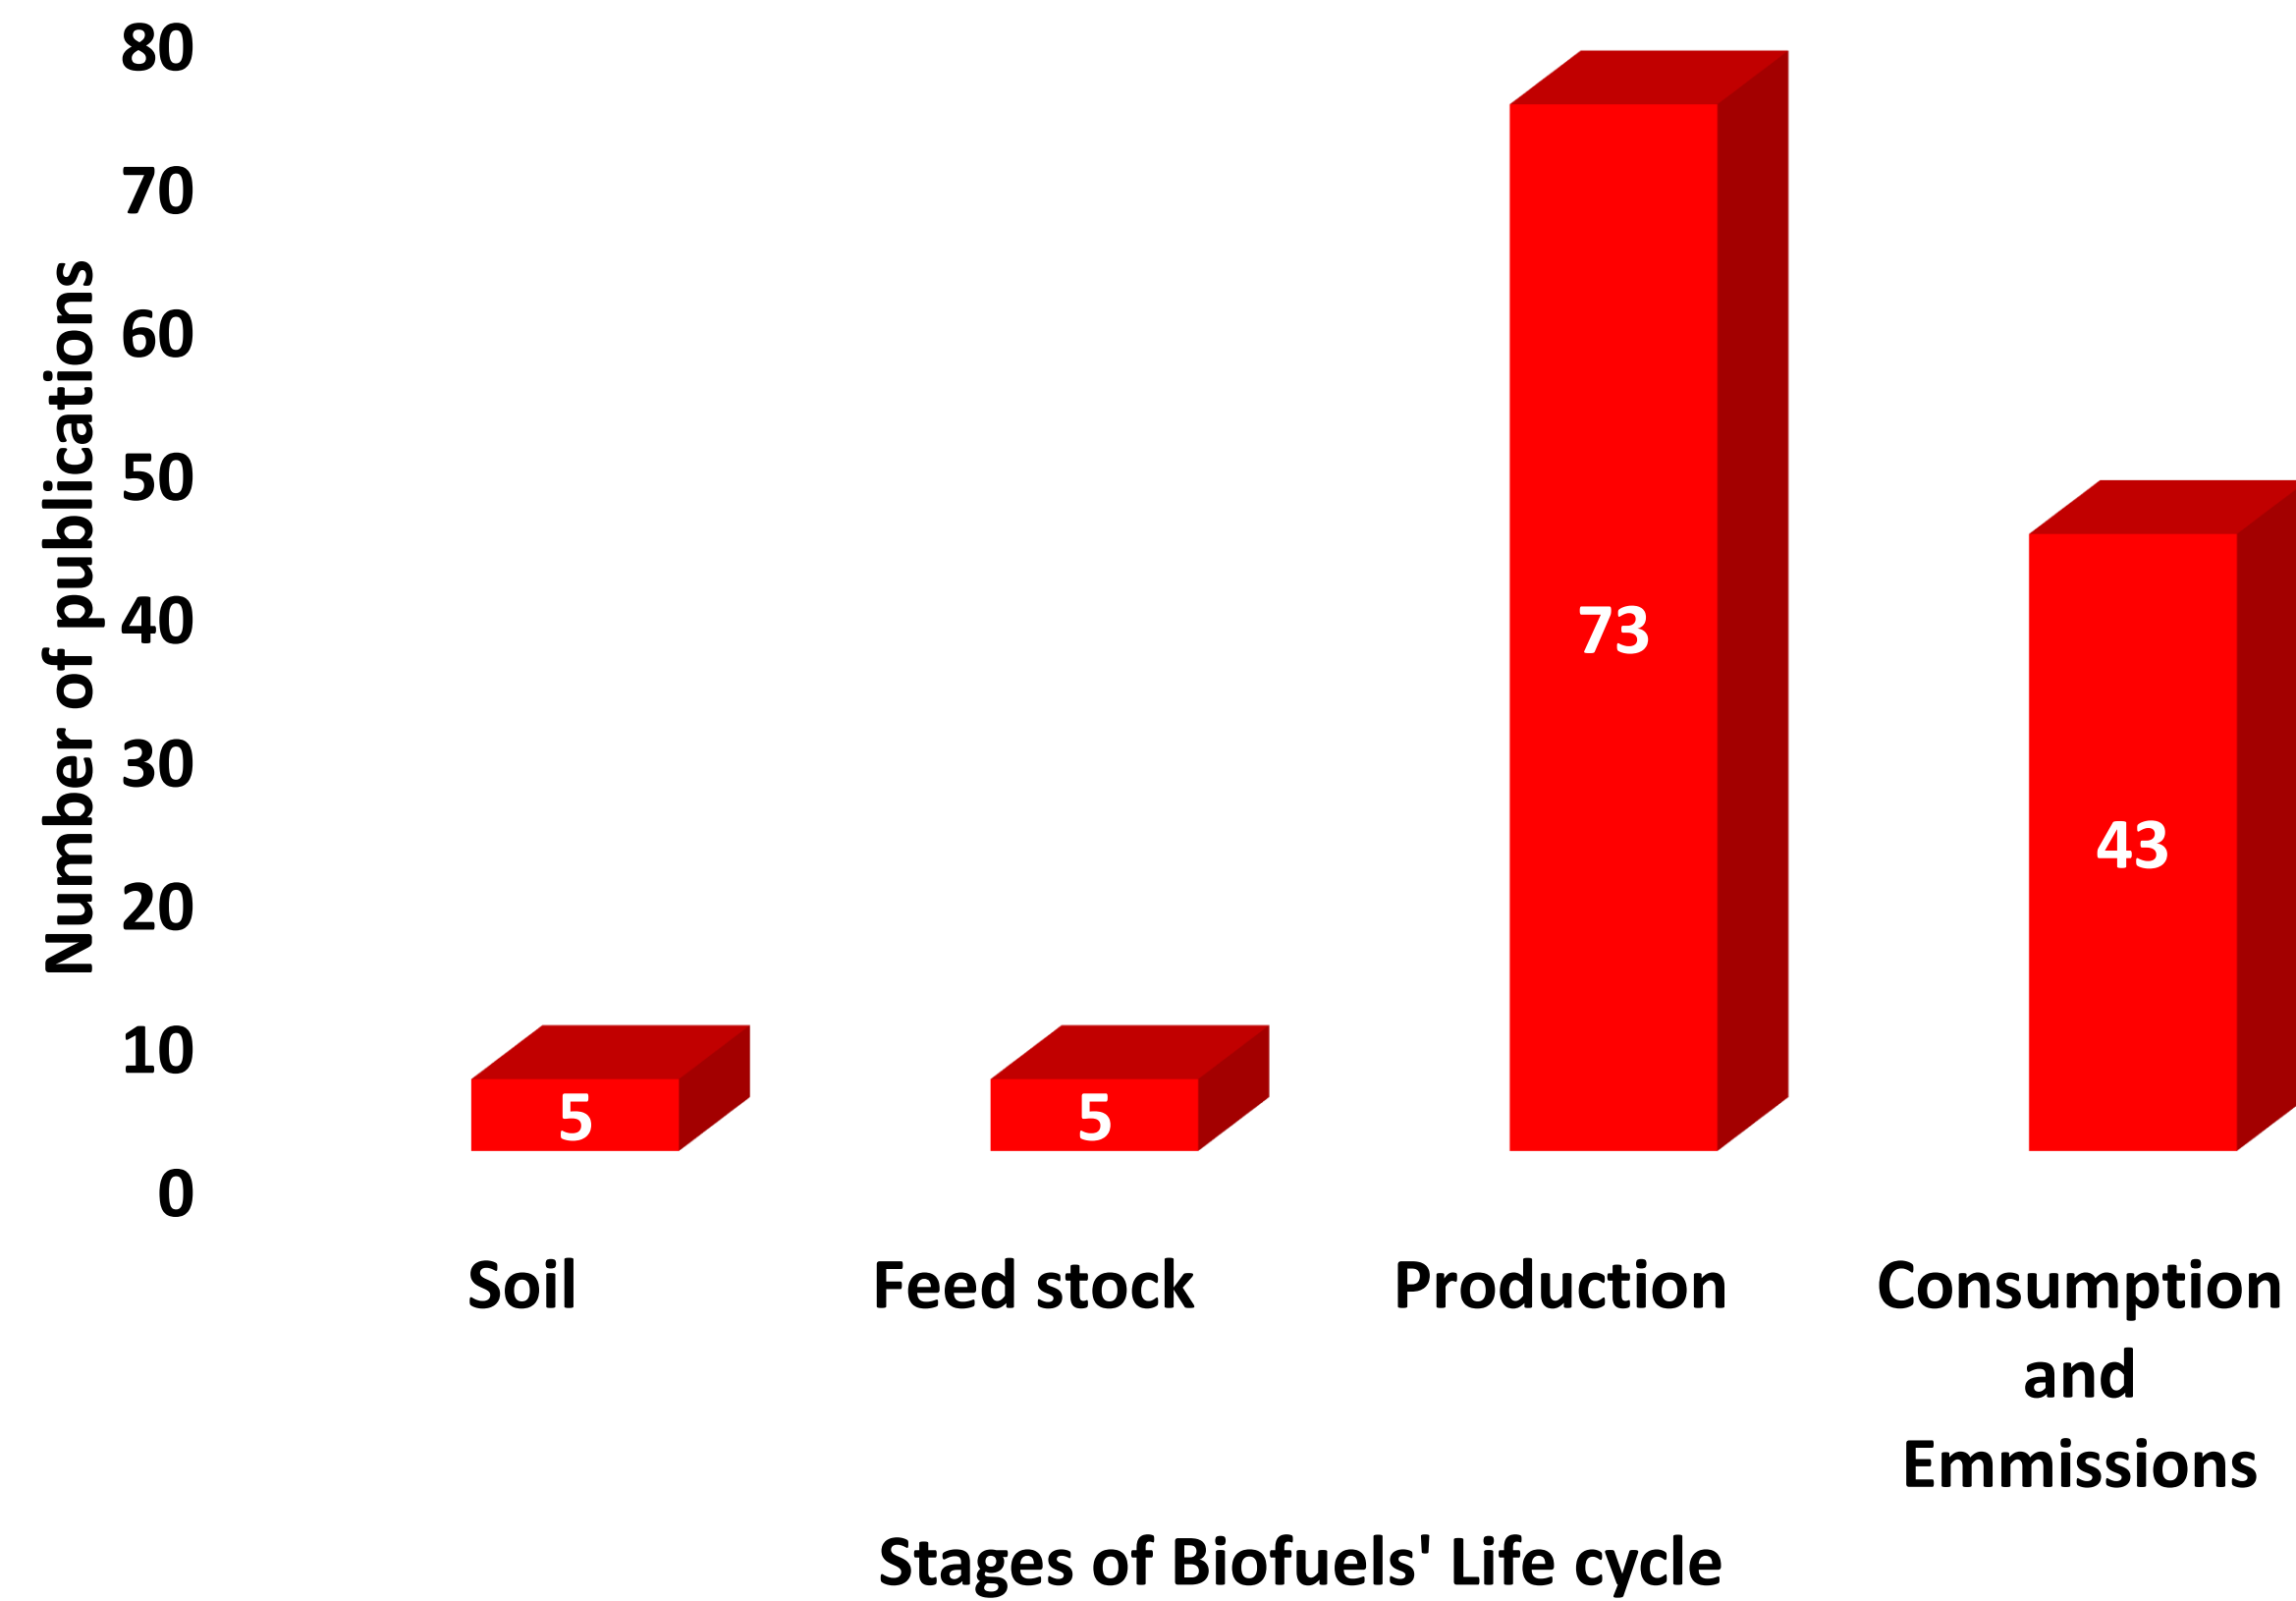

(a)

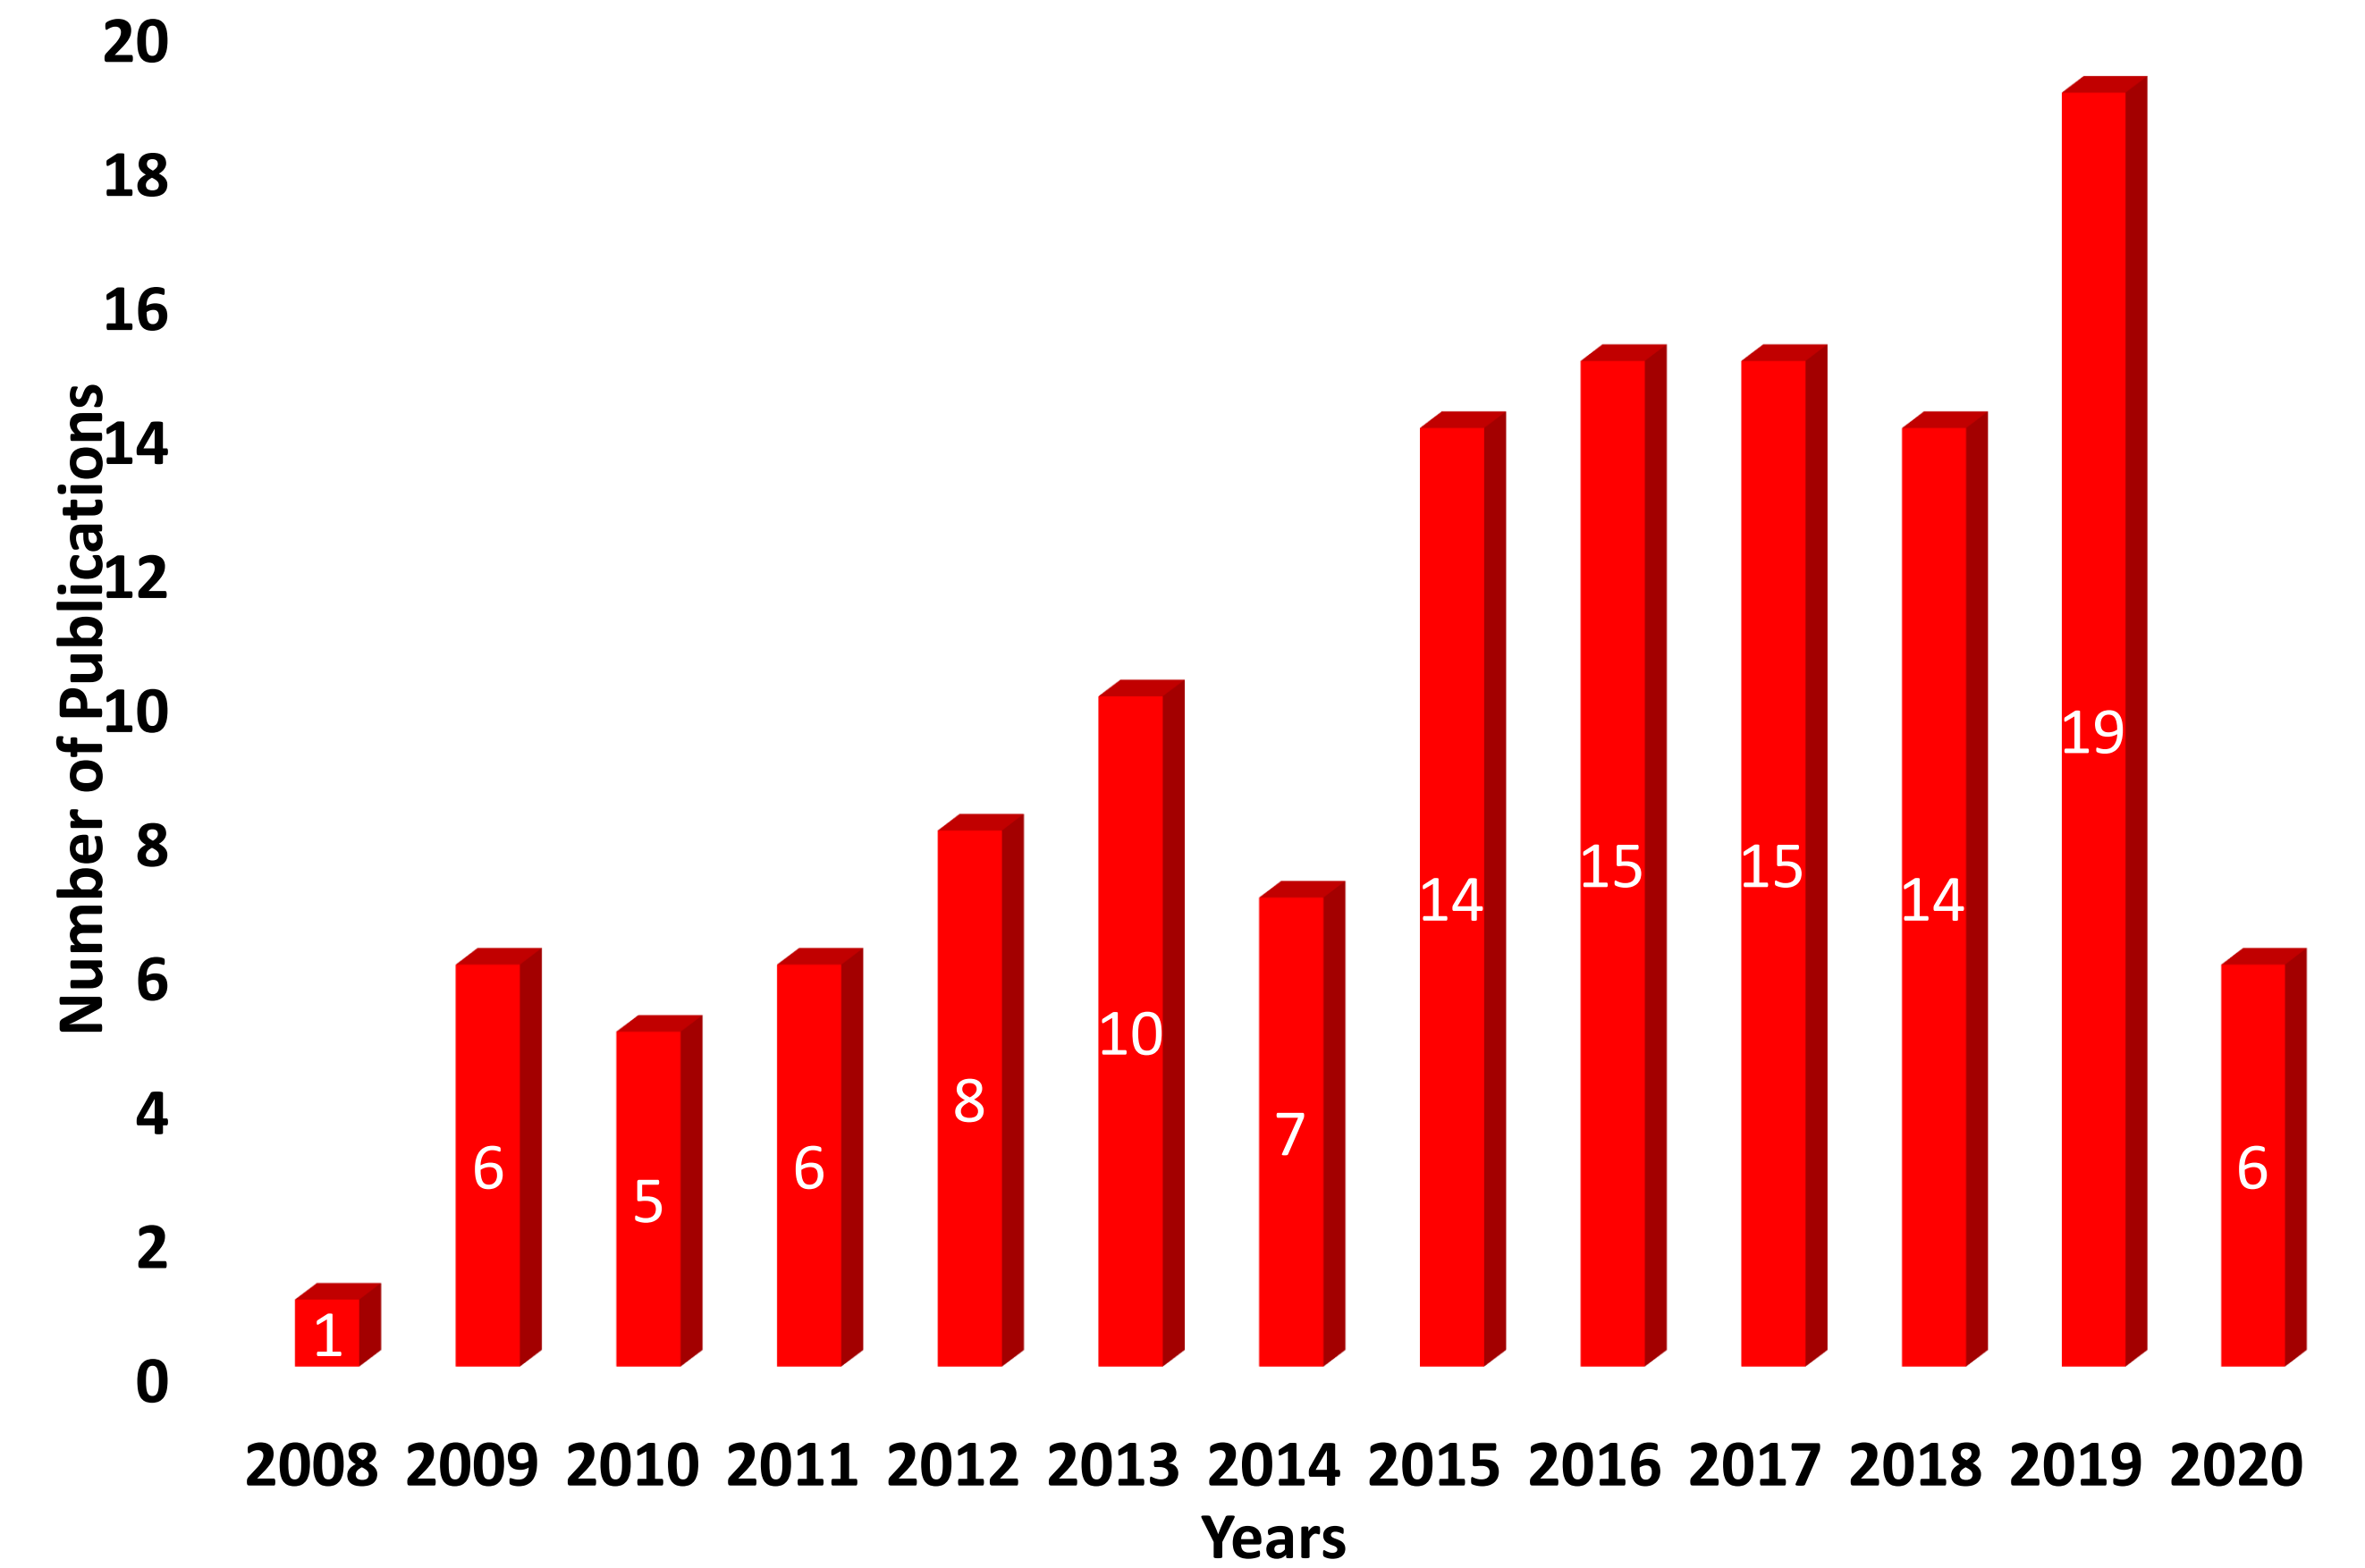

(b)

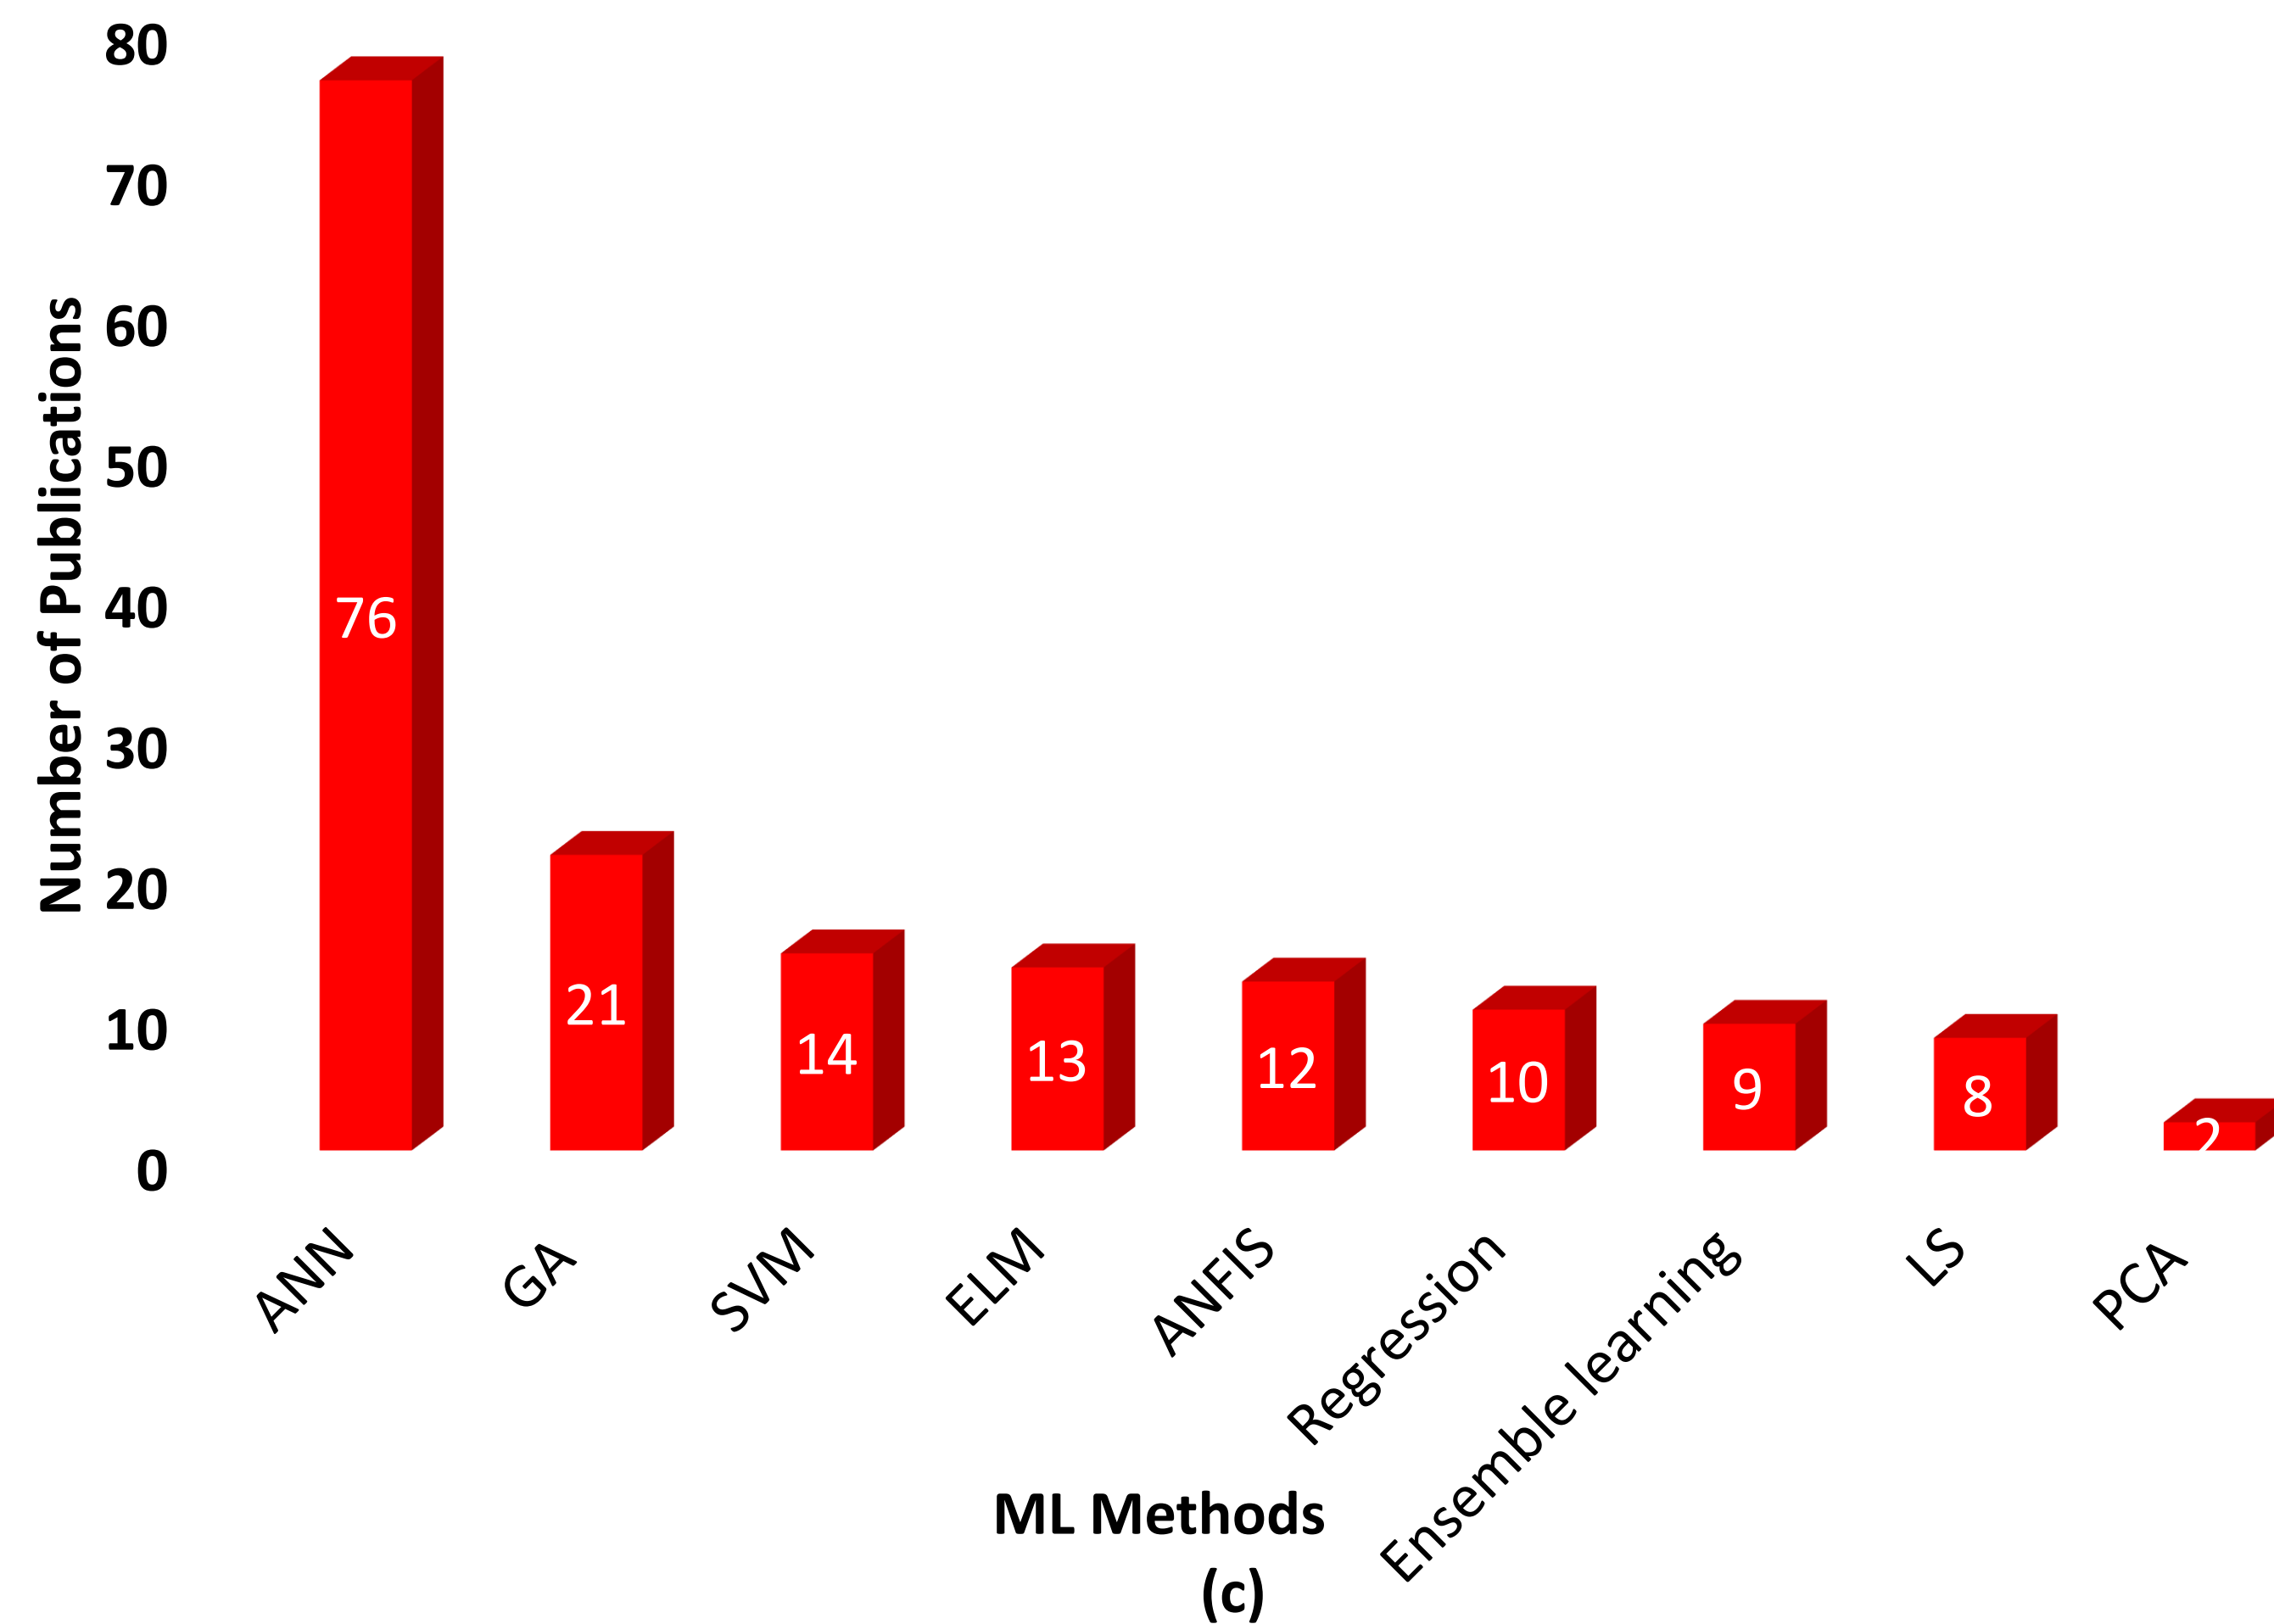

(c)

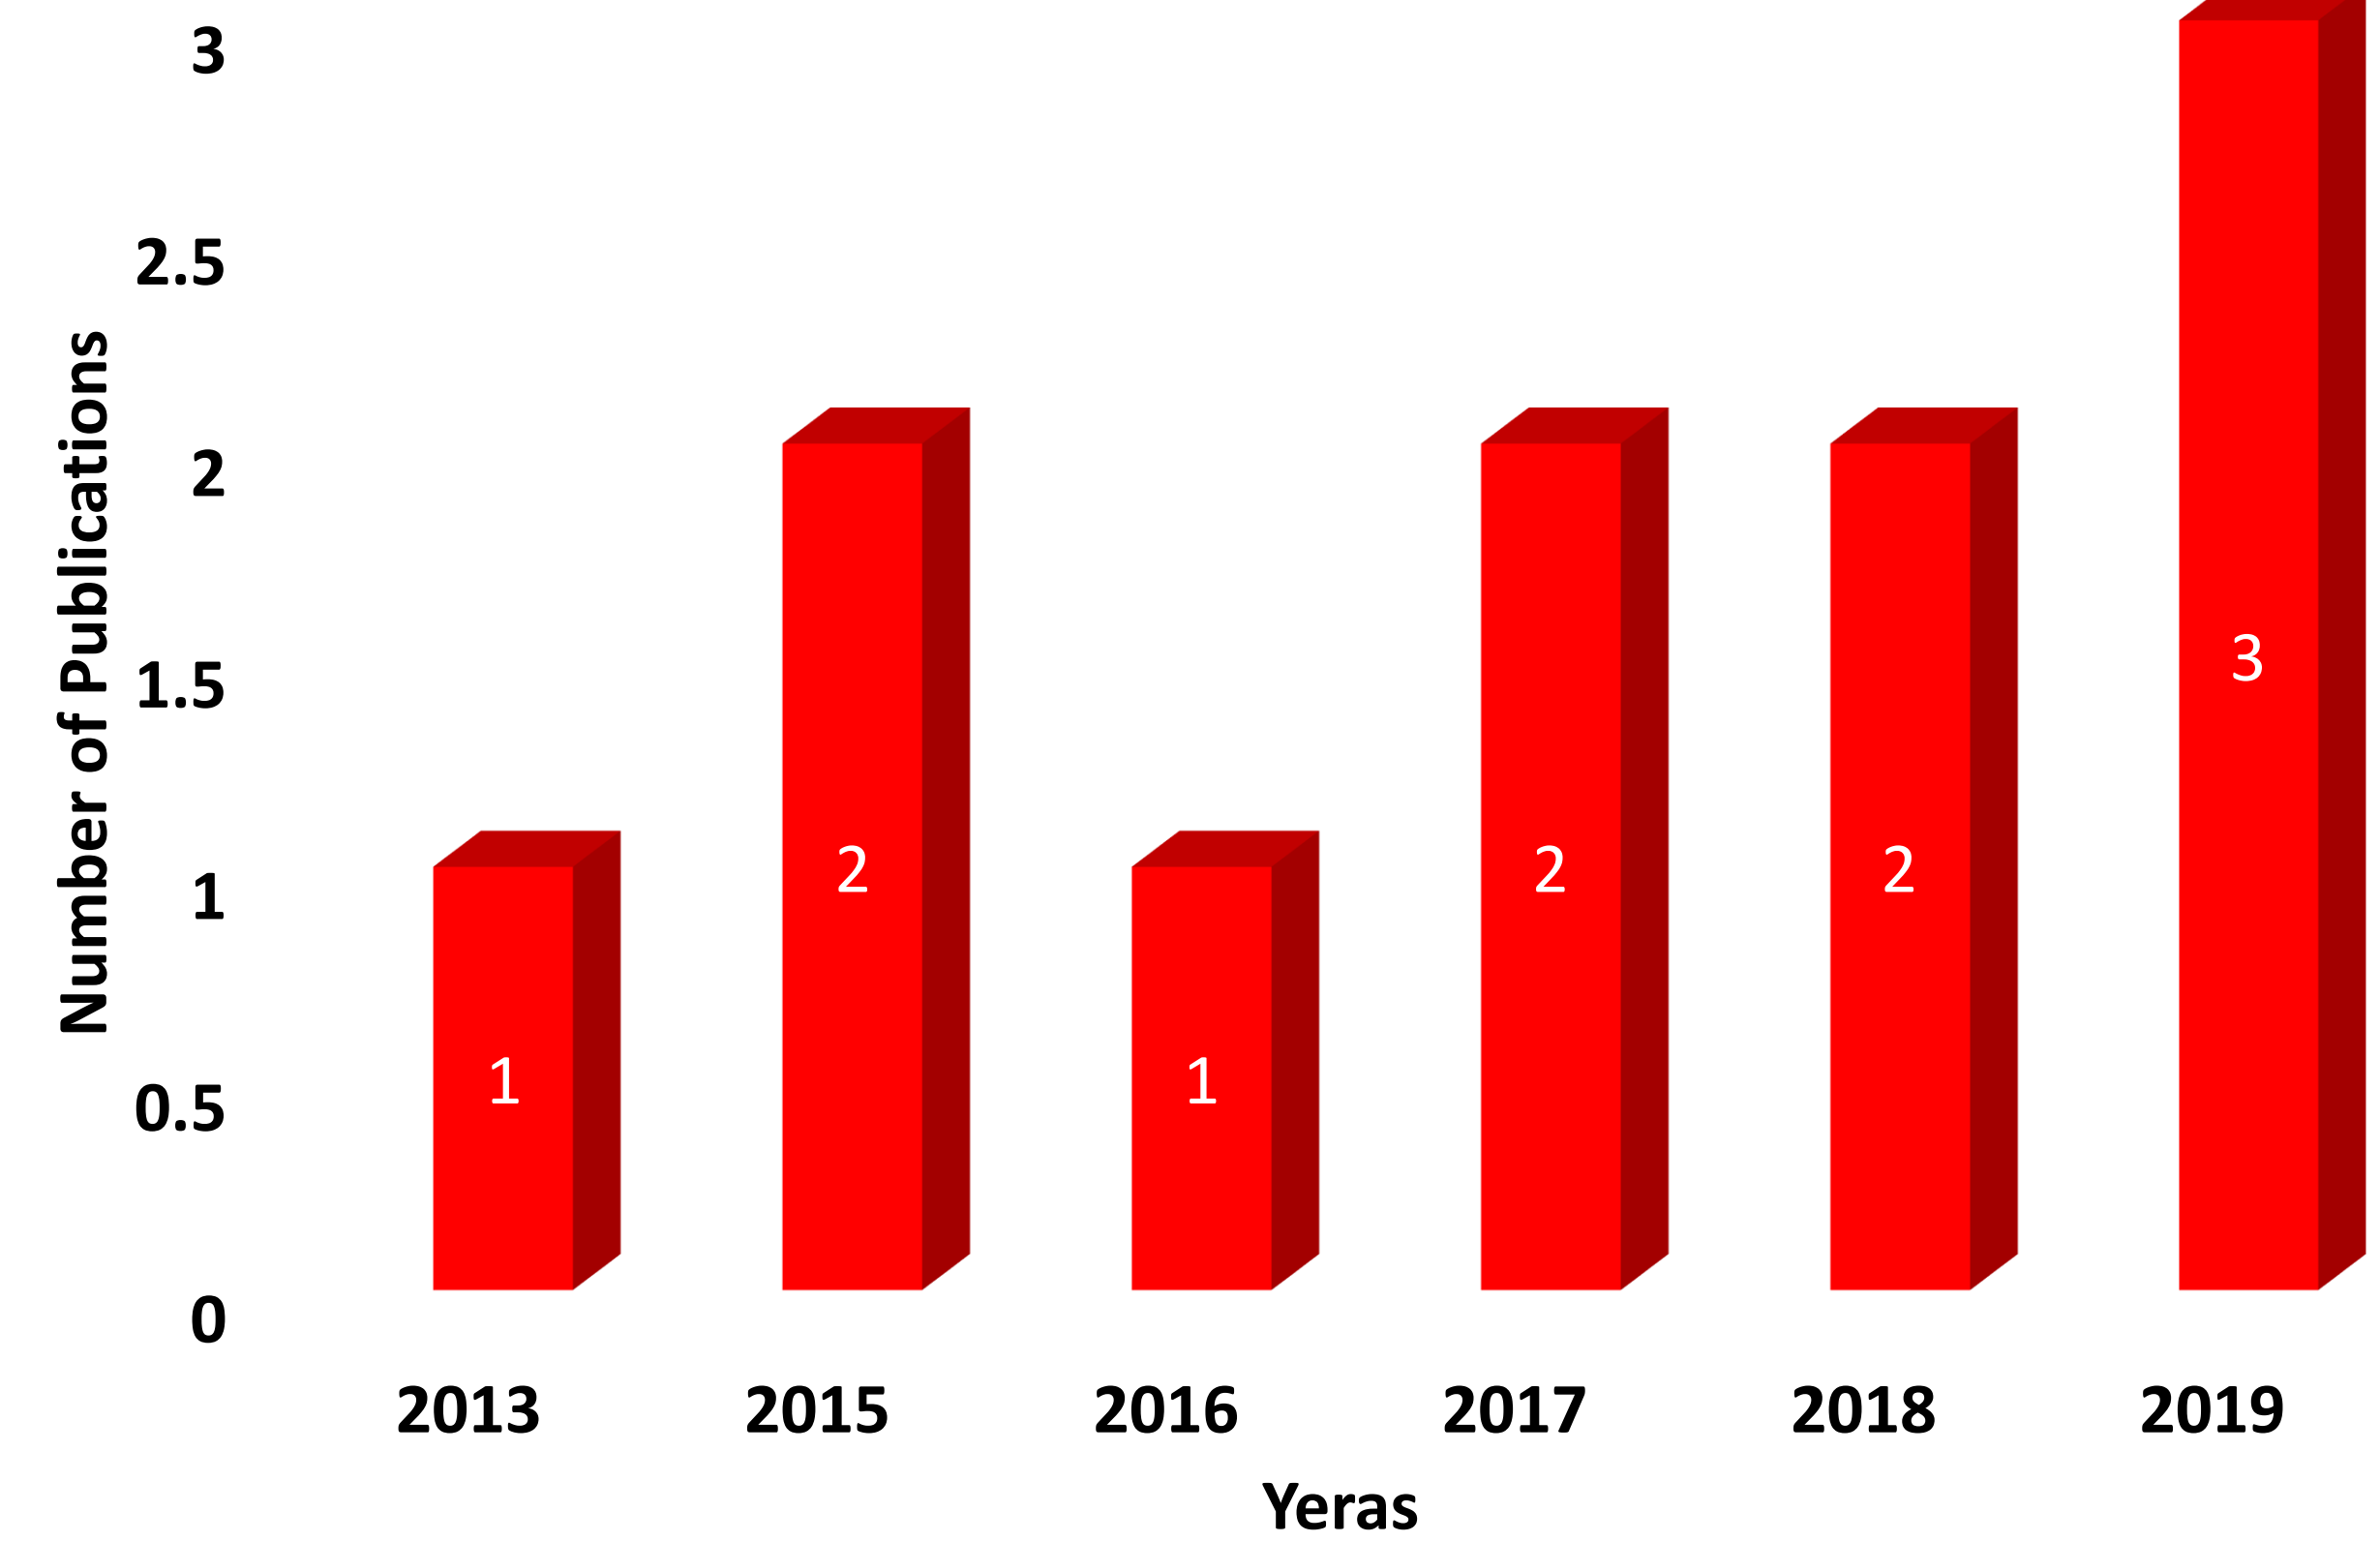

(d)

Supplement: Supplementary file 3 [file BiofuelsLifecycleDataTrends2.pdf]

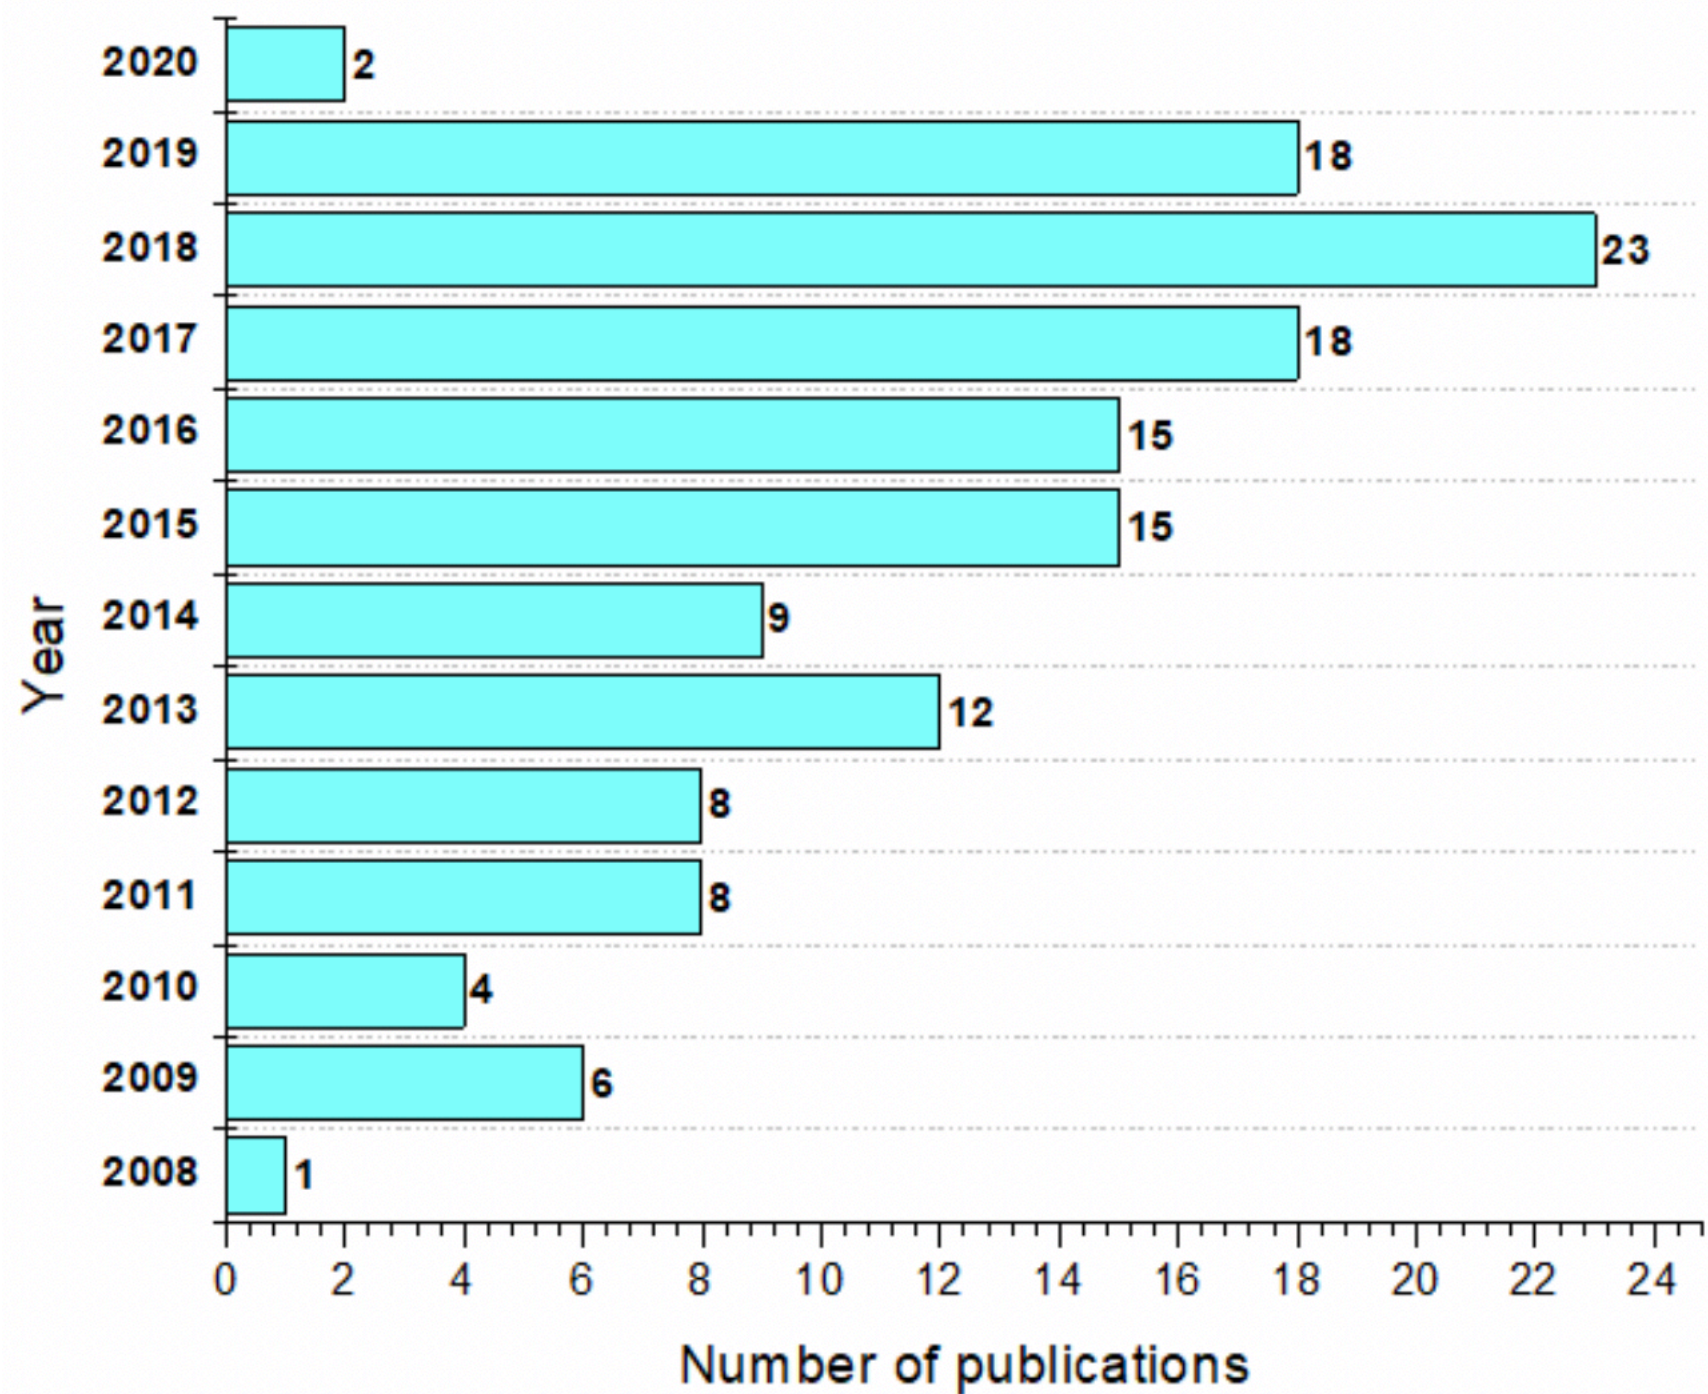

Supplement: Supplementary file 4 [file Figure_1.pdf]

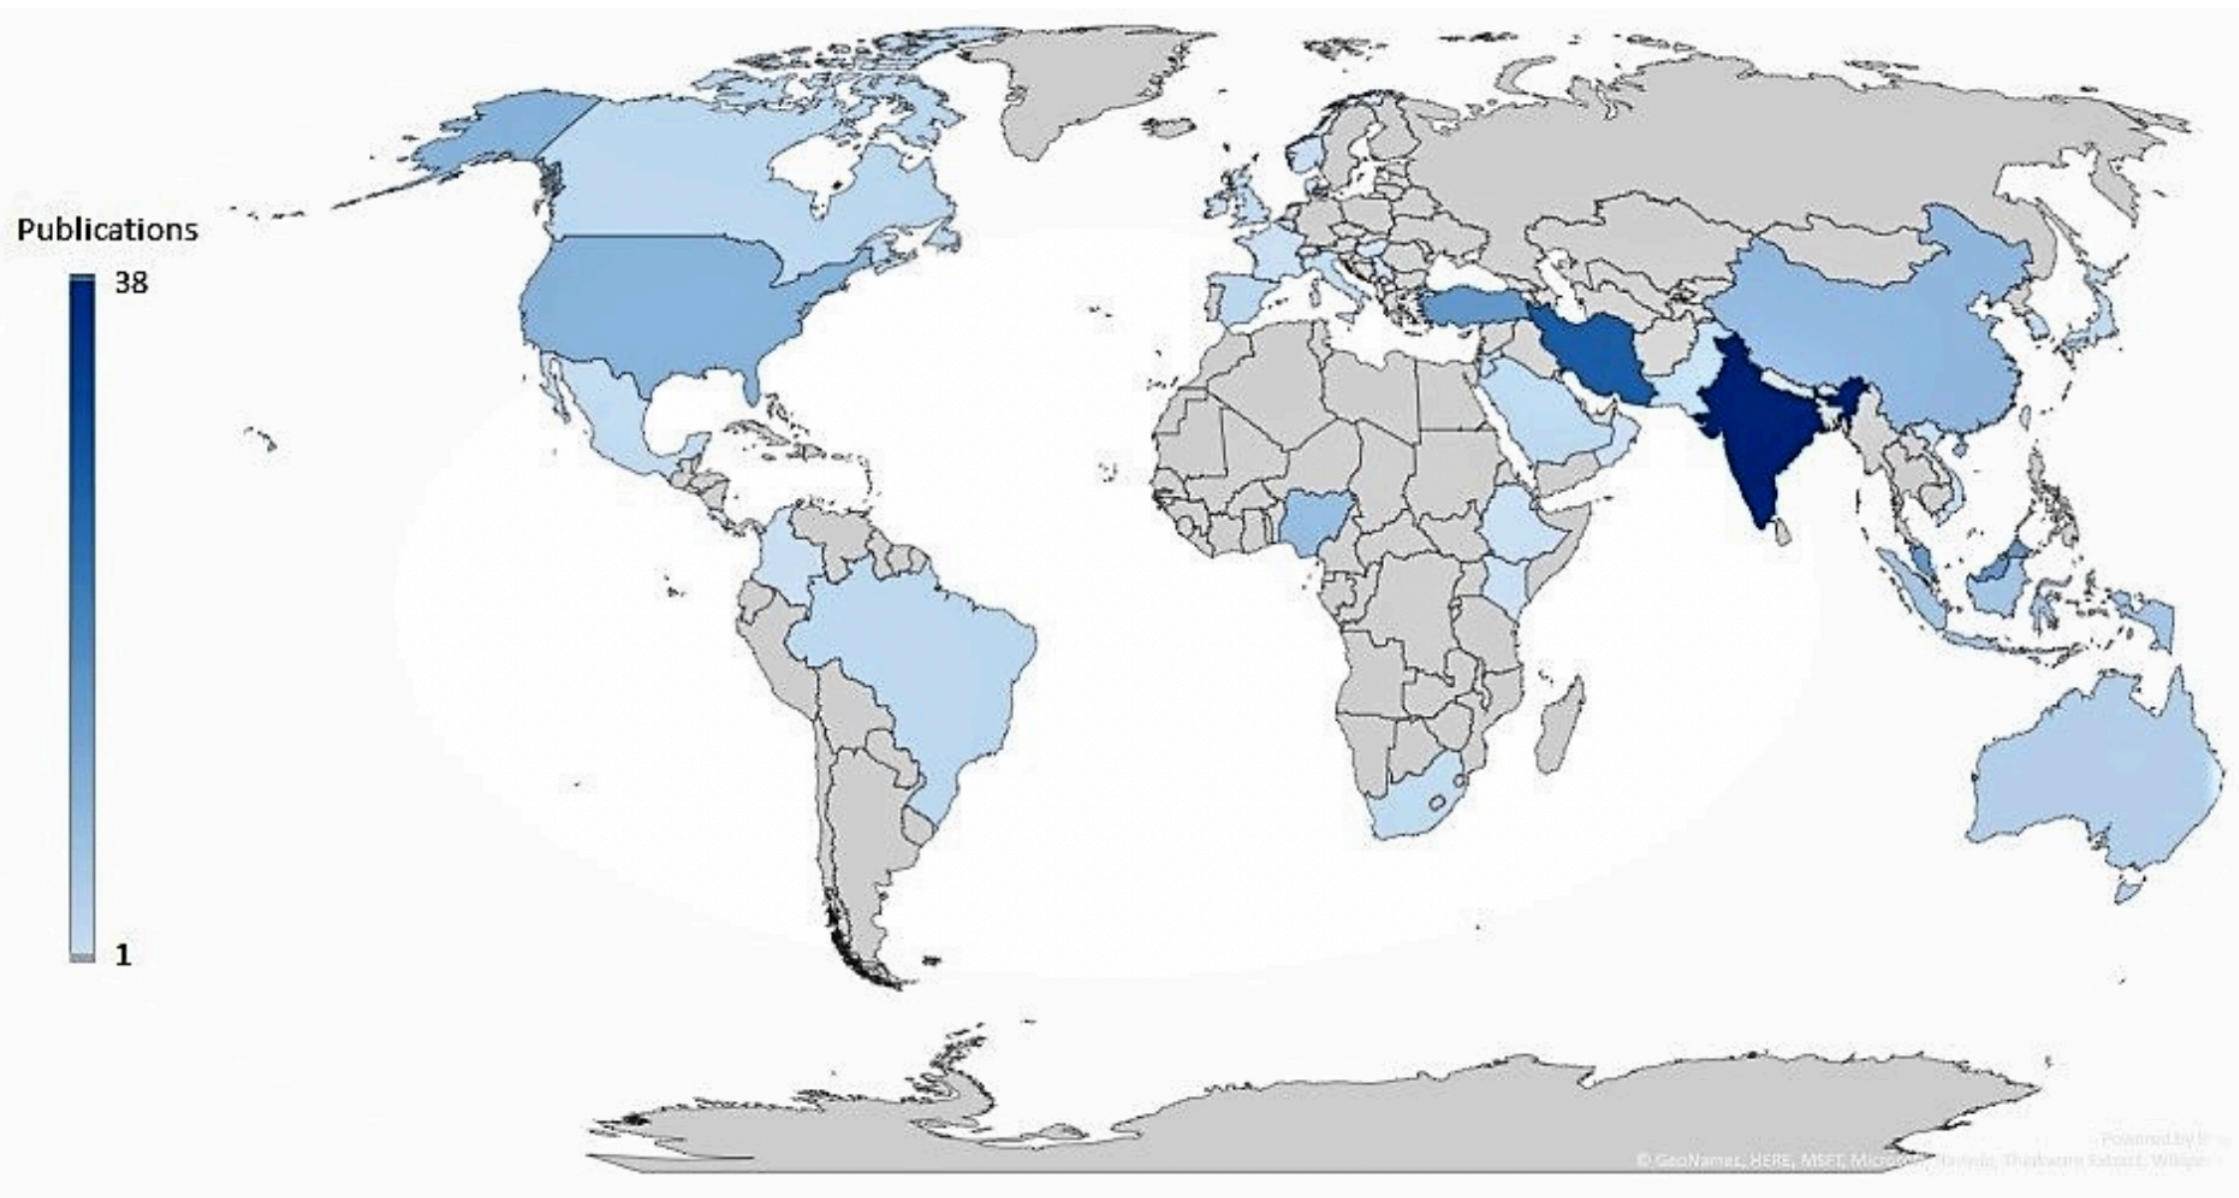

Supplement: Supplementary file 5 [file Figure_2.pdf]

Type of machine learning

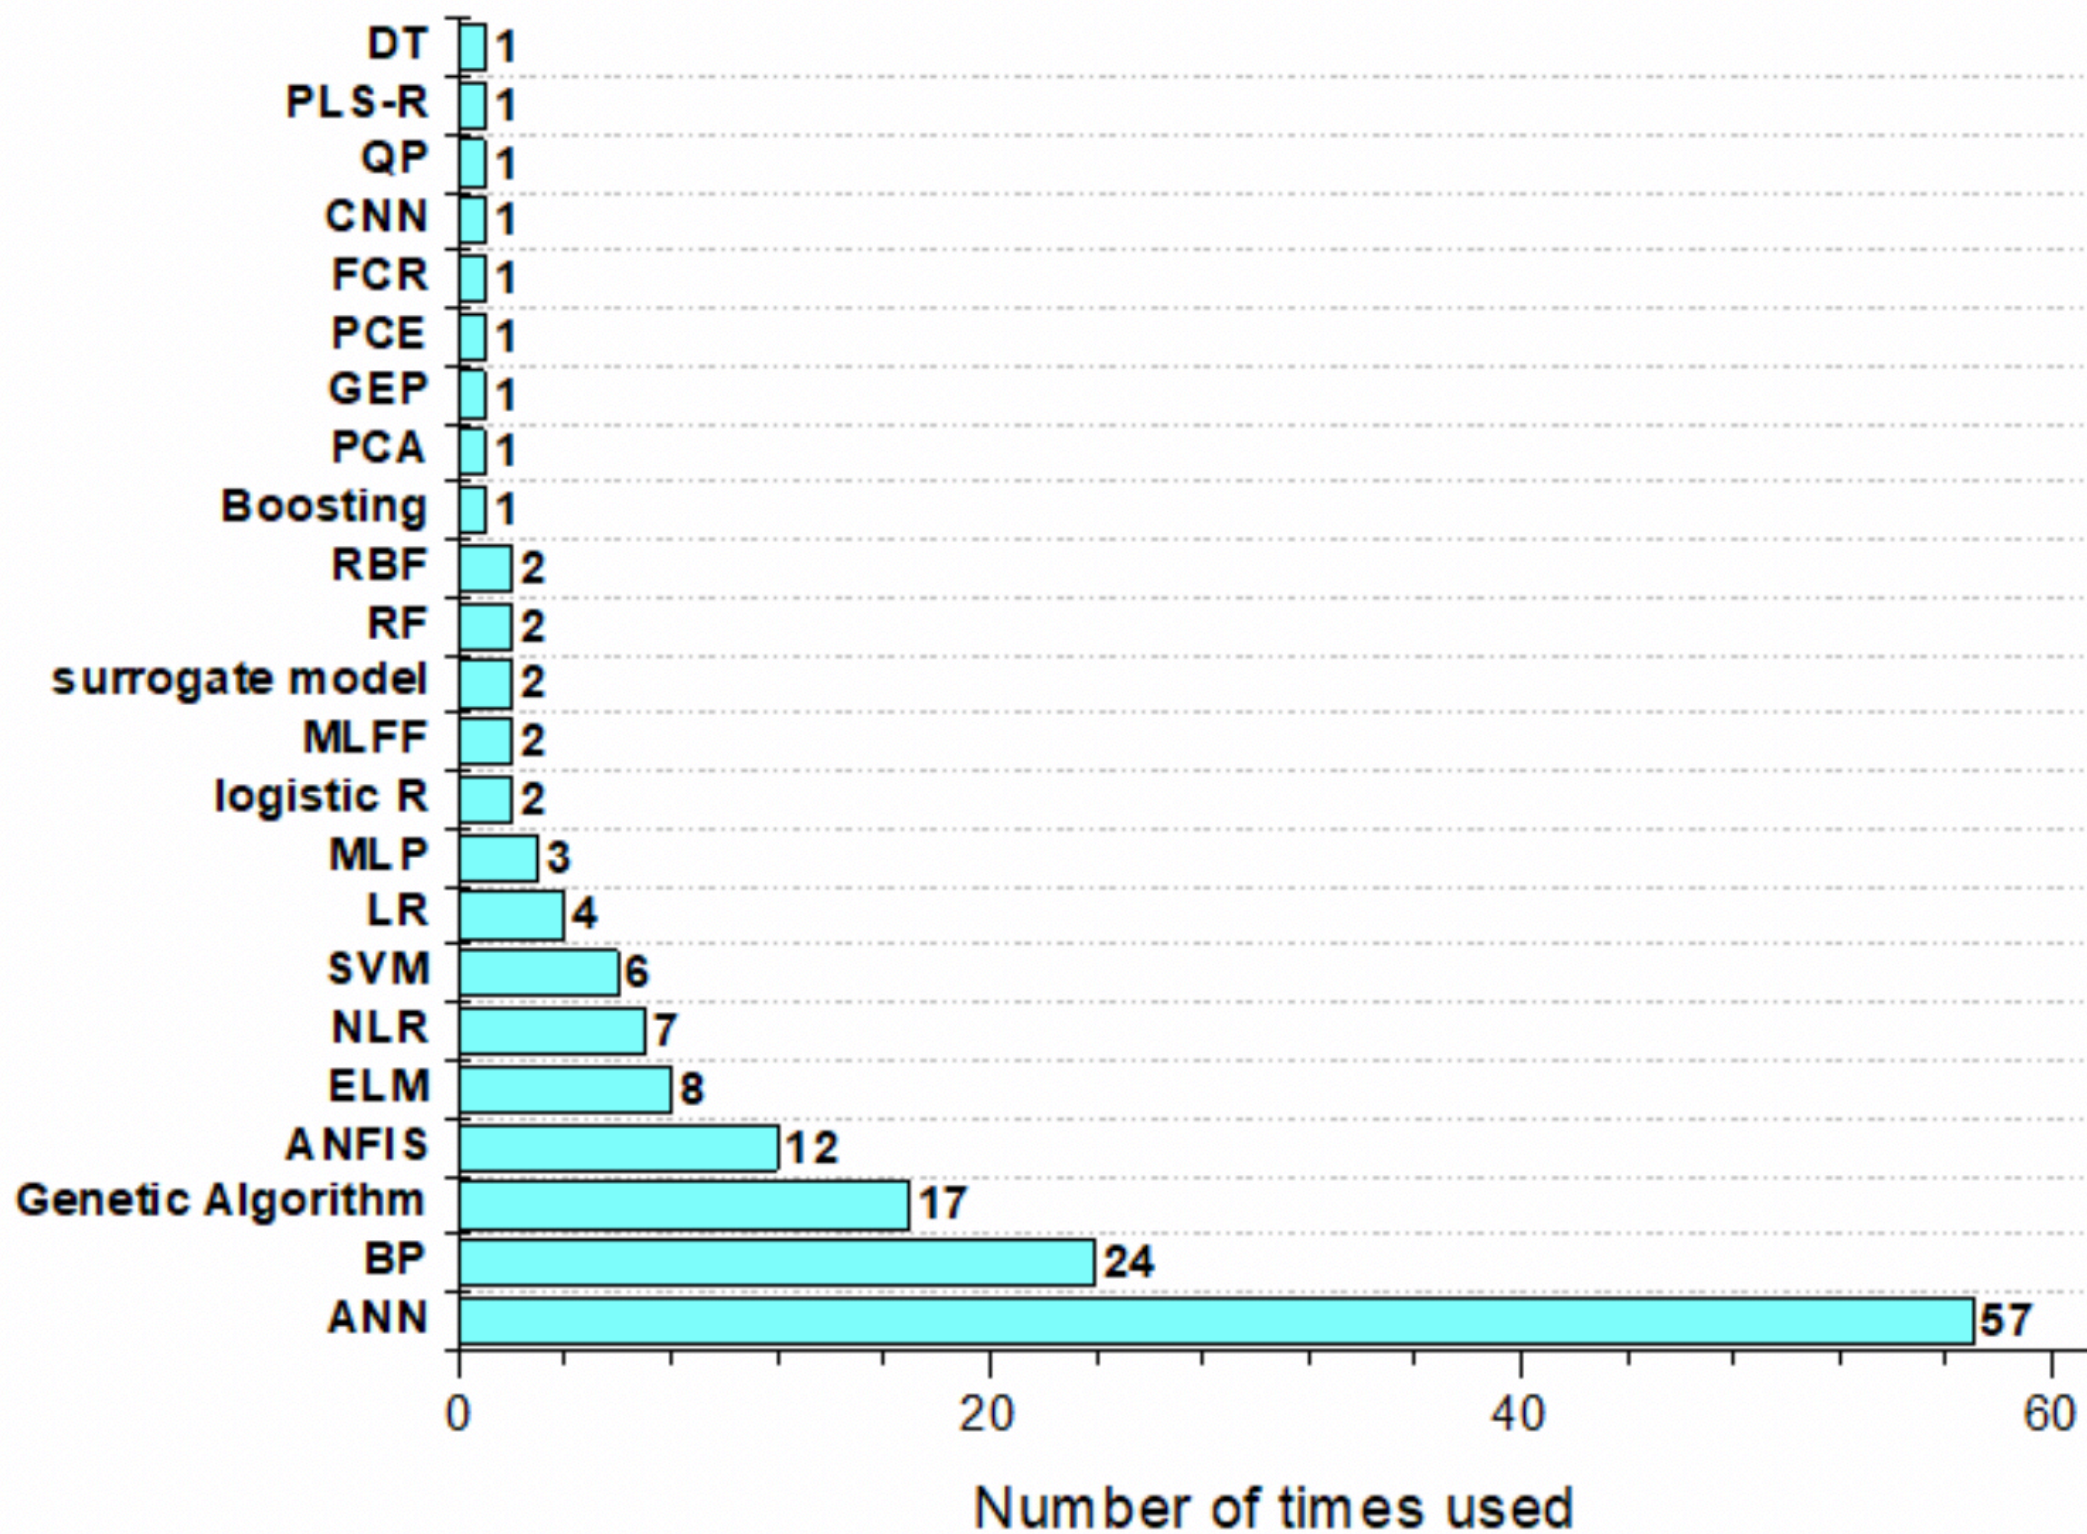

Supplement: Supplementary file 6 [file Figure_3.pdf]

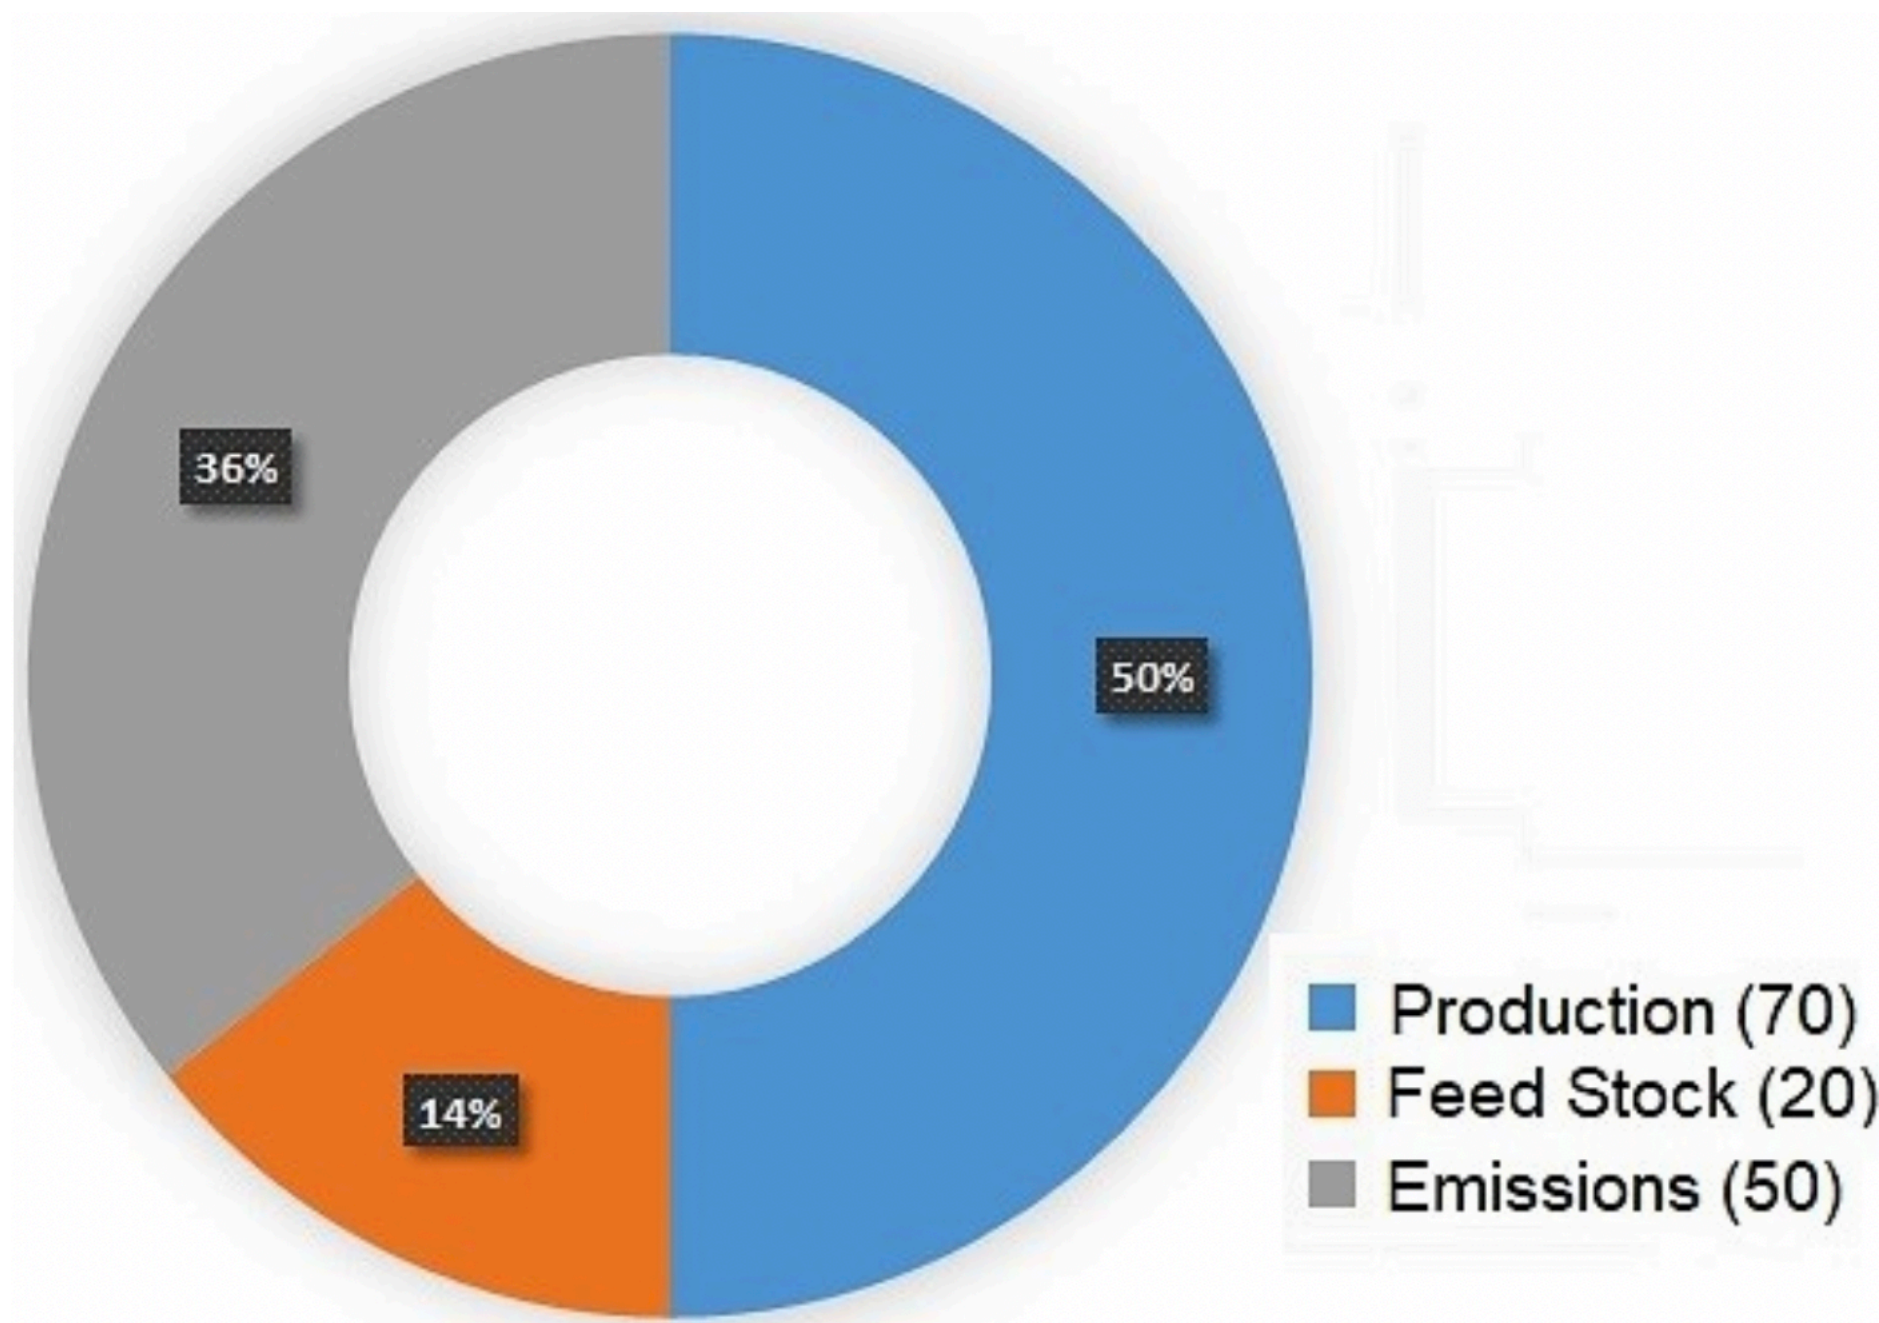

Supplement: Supplementary file 7 [file Figure_4.pdf]

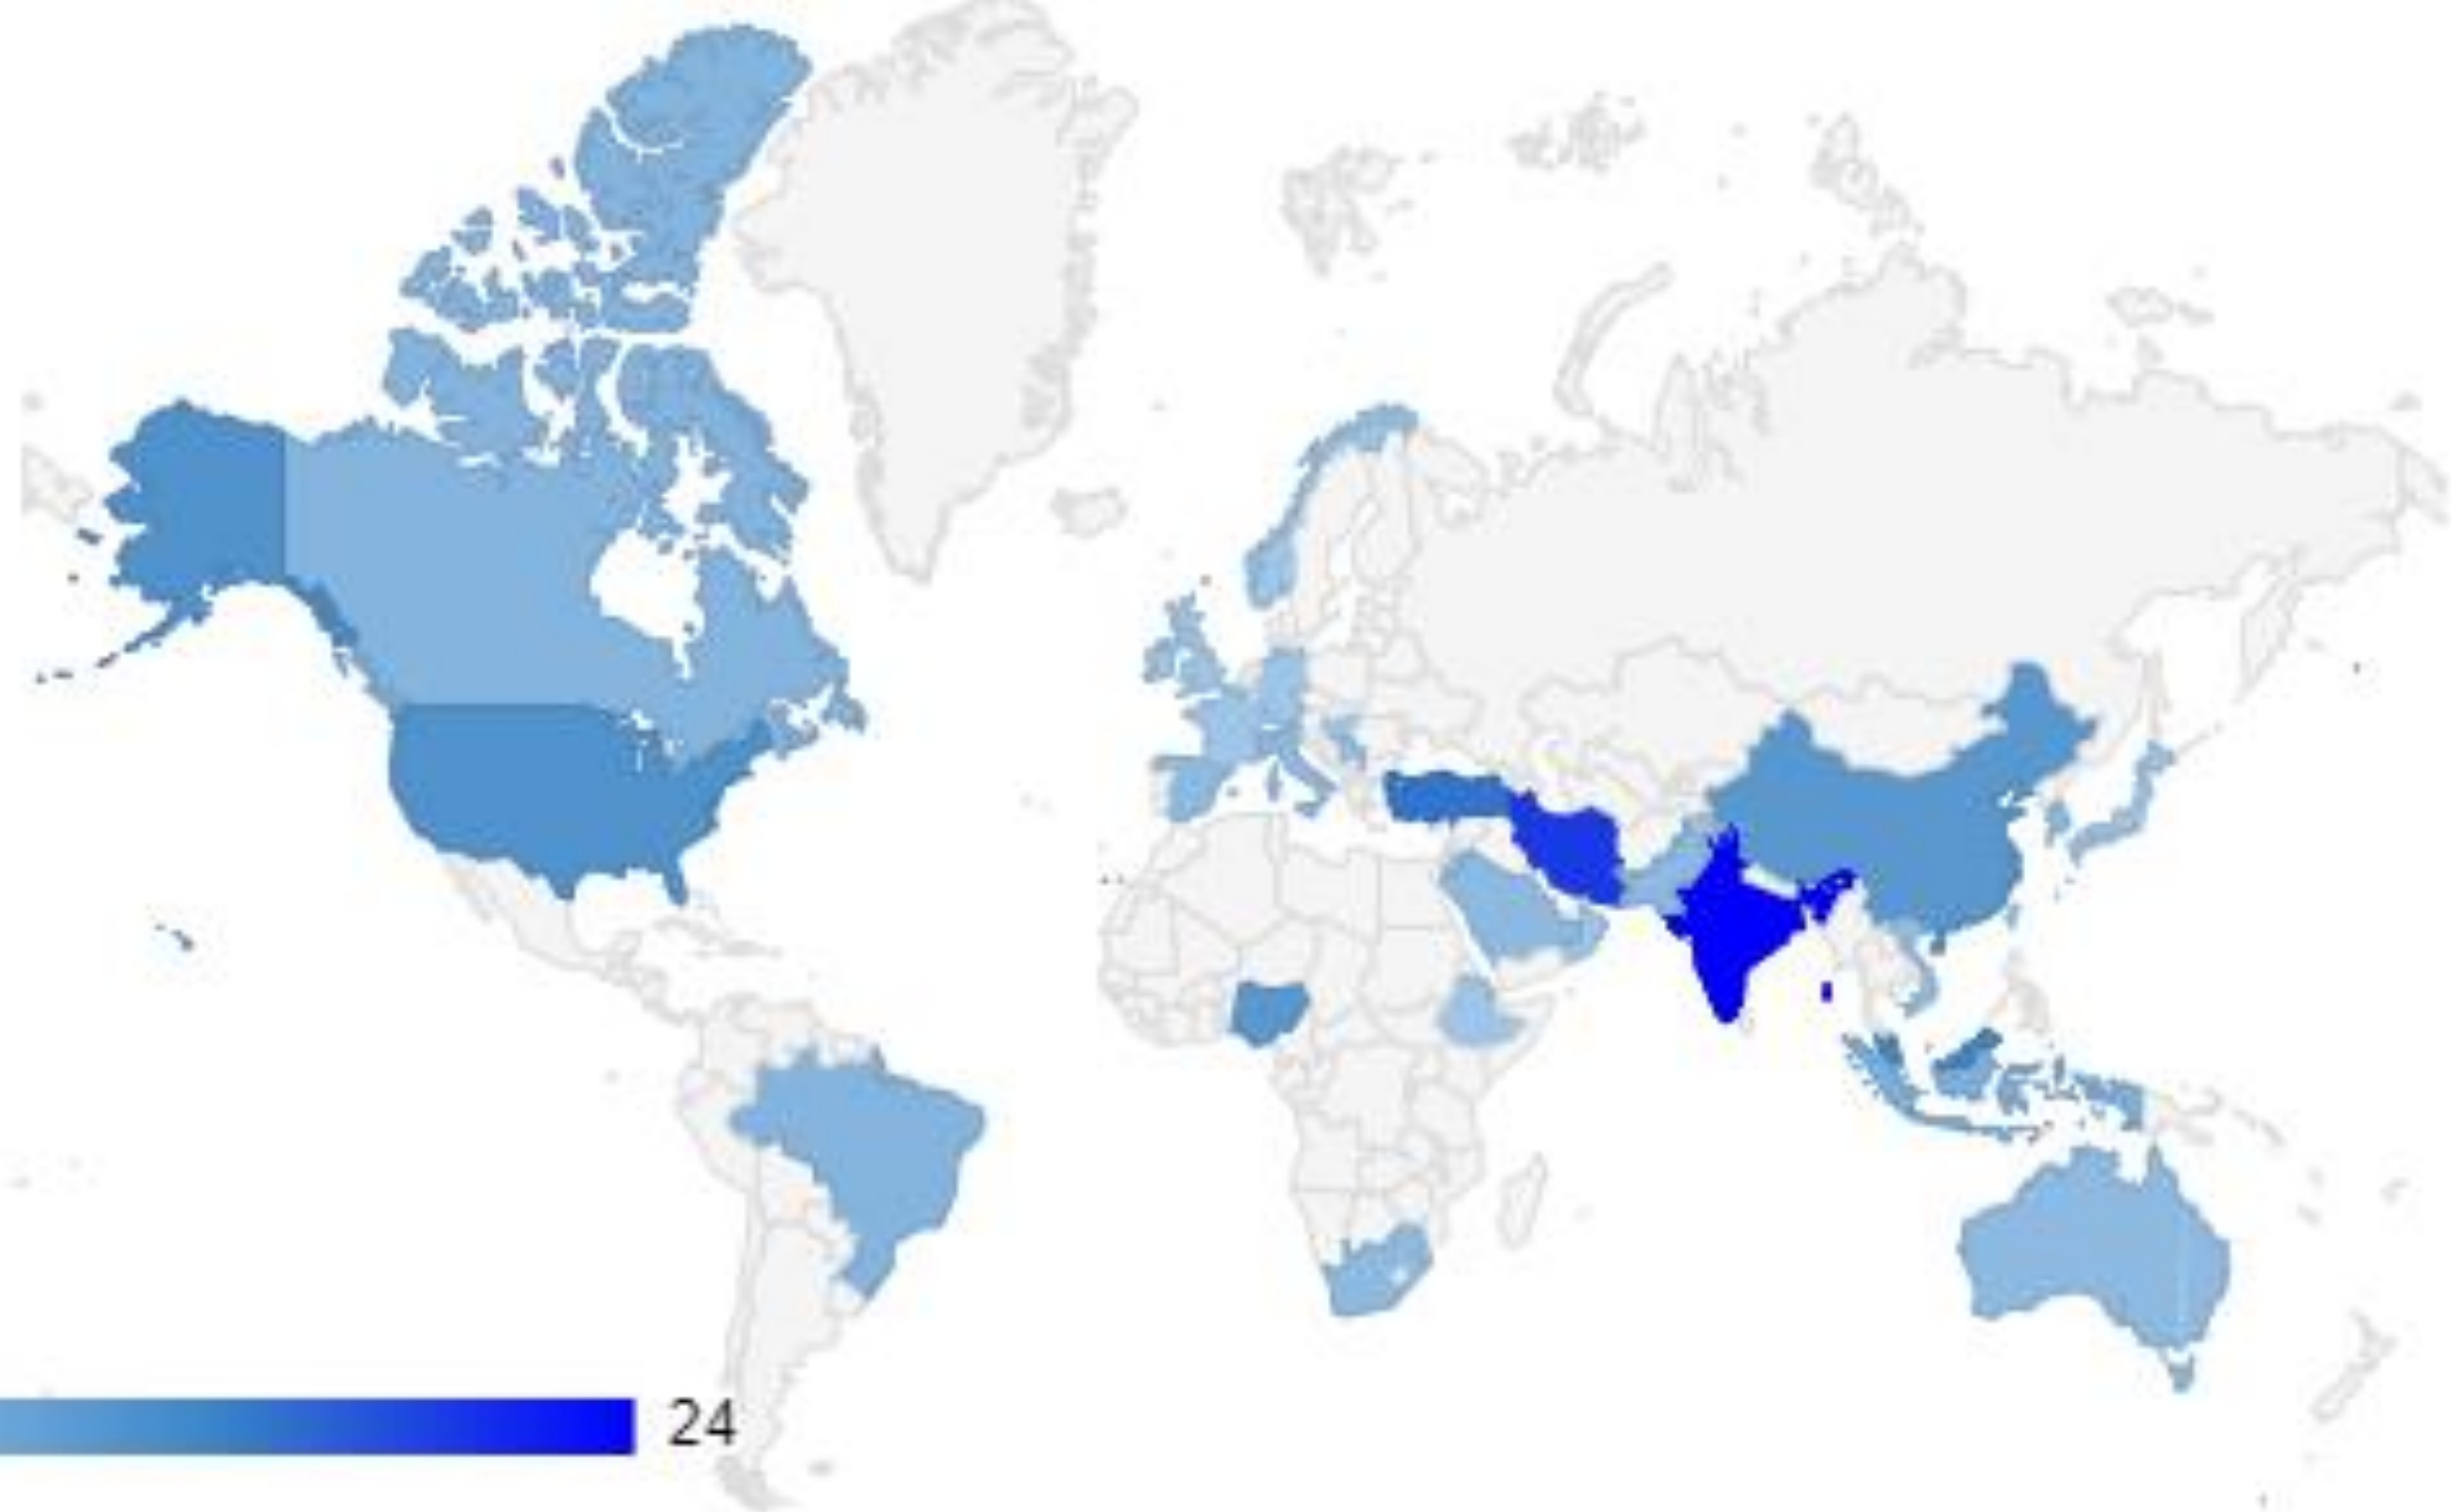

Supplement: Supplementary file 9 [file Region_Wise_Publication1.pdf]

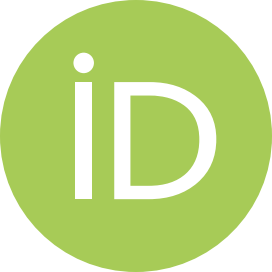

Supplement: Supplementary file 11 [file logo-orcid-eps-converted-to.pdf]
